# Supplementary material for: Recreated Ancestral Opsin Associated with Marine to Freshwater Croaker Invasion Reveals Kinetic and Spectral Adaptation
Source: PubMed Central journal article supplement — Mol Biol Evol. 2021 Jan 22;38(5):2076–87. doi: 10.1093/molbev/msab008 (PMC8097279; doi:10.1093/molbev/msab008), 2021-01-22
Supplement: msab008_supplementary_data.pdf [file msab008_supplementary_data.pdf]

**Table S1. Random-sites analyses (PAML) of the world-wide croaker rhodopsin dataset using the Bayesian species tree**

| Model | np  | lnL      | Parameter estimates: $d_N/d_S$ (proportion of sites)   | Null | LRT     | p value  |
|-------|-----|----------|--------------------------------------------------------|------|---------|----------|
| M0    | 225 | -7129.66 | 0.27(1.00)                                             |      |         |          |
| M1a   | 226 | -6627.71 | 0.02(0.85) 1.00 <sup>F</sup> (0.15)                    | M0   | 1003.91 | < 0.0001 |
| M2a   | 228 | -6525.91 | 0.02(0.84) 1.00 <sup>F</sup> (0.13) 4.53(0.04)         | M1a  | 203.60  | < 0.0001 |
| M7    | 226 | -6618.10 | $\beta$ (p = 0.01, q = 0.04)                           |      |         |          |
| M8a   | 227 | -6608.15 | $\beta$ (p = 0.13, q = 2.94), 1.00 <sup>F</sup> (0.12) |      |         |          |
| M8    | 228 | -6517.02 | $\beta$ (p = 0.06, q = 0.38), 4.16(0.04)               | M7   | 202.16  | < 0.0001 |
|       |     |          |                                                        | M8a  | 182.26  | < 0.0001 |

Note: lnL, ln likelihood; <sup>F</sup>,  $d_N/d_S$  estimate fixed at reported value; LRT, likelihood ratio test result

**Table S2. Random-sites analyses (PAML) of the world-wide croaker rhodopsin dataset using the maximum likelihood species tree**

| Model | np  | lnL      | Parameter estimates: $d_N/d_S$ (Proportion of sites)  | Null | LRT   | p value  |
|-------|-----|----------|-------------------------------------------------------|------|-------|----------|
| M0    | 227 | -7075.70 | 0.26(1.00)                                            | n/a  |       |          |
| M1a   | 228 | -6586.36 | 0.02(0.85) 1.00 <sup>F</sup> (0.15)                   | M0   | 978.7 | < 0.0001 |
| M2a   | 230 | -6490.44 | 0.03(0.84) 1.00 <sup>F</sup> (0.13) 4.54(0.03)        | M1a  | 191.8 | < 0.0001 |
| M7    | 228 | -6579.96 | $\beta$ (p = 0.06, q = 0.30)                          |      |       |          |
| M8a   | 229 | -6569.04 | $\beta$ (p = 0.13, q = 3.07) 1.00 <sup>F</sup> (0.12) | M7   | 21.8  | < 0.0001 |
| M8    | 230 | -6483.41 | $\beta$ (p = 0.06, q = 0.39) 4.13(0.04)               | M7   | 193.1 | < 0.0001 |
|       |     |          |                                                       | M8a  | 171.2 | < 0.0001 |

Note: lnL, ln likelihood; <sup>F</sup>,  $d_N/d_S$  estimate fixed at reported value; LRT, likelihood ratio test result

**Table S3. Random-sites analyses (PAML) of the world-wide croaker rhodopsin dataset using the maximum likelihood rhodopsin gene tree**

| Model | np  | lnL      | Parameter estimates: $d_N/d_S$ (Proportion of sites)  | Null | LRT   | p value  |
|-------|-----|----------|-------------------------------------------------------|------|-------|----------|
| M0    | 227 | -6673.45 | 0.24(1.00)                                            |      |       |          |
| M1a   | 228 | -6277.64 | 0.02(0.84) 1.00 <sup>F</sup> (0.16)                   | M0   | 791.6 | < 0.0001 |
| M2a   | 230 | -6206.98 | 0.02(0.84) 1.00 <sup>F</sup> (0.16) 8.94(0.01)        | M1a  | 141.3 | < 0.0001 |
| M7    | 228 | -6271.43 | $\beta$ (p = 0.06, q = 0.32)                          |      |       |          |
| M8a   | 229 | -6263.12 | $\beta$ (p = 0.12, q = 2.61) 1.00 <sup>F</sup> (0.11) | M7   | 16.6  | < 0.0001 |
| M8    | 230 | -6202.27 | $\beta$ (p = 0.01, q = 0.34) 8.29(0.01)               | M7   | 138.3 | < 0.0001 |
|       |     |          |                                                       | M8a  | 121.7 | < 0.0001 |

Note: lnL, ln likelihood; <sup>F</sup>,  $d_N/d_S$  estimate fixed at reported value; LRT, likelihood ratio test result

**Table S4. Positively selected sites identified in statistically significant tests of positive selection**

---

***Full rhodopsin dataset, Bayesian phylogeny***

M2a (BEB) –  $d_N/d_S = 4.53$

**82, 162, 165, 169, 173, 209, 214, 218, 262**

M8 (BEB) –  $d_N/d_S = 4.16$

**33, 82, 112, 162, 165, 169, 173, 209, 214, 218, 262, 299**

FUBAR

**33, 37, 39, 40, 112, 115, 151, 165, 168, 173, 209, 214, 218, 256, 263, 266, 271, 290, 299**

South American marine to freshwater transitional branch as foreground – Branch-Site (BEB) –  $d_N/d_S = 0.02/18.42, 1.00^F/18.42$

**119, 122, 159, 261, 282**

***Dataset with freshwater lineages removed, Bayesian phylogeny***

M2a (BEB) –  $d_N/d_S = 4.50$

**82, 112, 162, 165, 169, 209, 214, 218, 262**

M8 (BEB) –  $d_N/d_S = 4.31$

**33, 82, 112, 162, 165, 169, 173, 209, 214, 218, 262, 299**

***South American dataset, Bayesian phylogeny***

M2a

**162, 165, 214, 218**

Marine lineages as foreground – Branch-Site (BEB) –  $d_N/d_S = 0.02/9.53, 1.00^F/9.53$

**82, 162, 165, 214, 218**

Freshwater clade as foreground – Branch-Site (BEB) –  $d_N/d_S = 0.02/10.75, 1.00^F/10.75$

**50, 52, 165, 173**

Marine to freshwater transitional branch as foreground – Branch-Site (BEB) –  $d_N/d_S = 0.02/23.52, 1.00^F/23.52$

**63, 119, 122, 124, 158, 159, 169, 214, 261, 282, 304**

---

Note:  $d_N/d_S$  estimates for the positively selected site class reported for each model (background/foreground); all sites reported have posterior probabilities greater than 0.7

**Table S5. Branch-sites and clade model analyses (PAML) comparing  $d_N/d_S$  estimates for the transitional branches of the world-wide croaker rhodopsin dataset using the Bayesian species tree**

| Model                                           | np  | lnL      | Parameter Estimates: $d_N/d_S$ (proportion of sites): |                          |                               | Null                                        | LRT          | p value |           |
|-------------------------------------------------|-----|----------|-------------------------------------------------------|--------------------------|-------------------------------|---------------------------------------------|--------------|---------|-----------|
|                                                 |     |          | background                                            | $d_N/d_S$                | foreground                    |                                             |              |         | $d_N/d_S$ |
| M2aREL                                          | 228 | -6525.91 | 0.02(0.84)                                            | 1.00 <sup>F</sup> (0.13) | 4.53(0.04)                    |                                             |              |         |           |
| M3                                              | 229 | -6525.91 | 0.02(0.83)                                            | 0.99(0.13)               | 4.51(0.04)                    |                                             |              |         |           |
| <b>All Freshwater transitions as Foreground</b> |     |          |                                                       |                          |                               |                                             |              |         |           |
| Br-site alt                                     | 228 | -6620.94 | 0.02(0.82)                                            | 1.00 <sup>F</sup> (0.14) | 0.02/5.62(0.04)               | 1.00 <sup>F</sup> /5.62(0.01)               | Br-site null | 4.98    | 0.0256    |
| Br-site null                                    | 227 | -6623.43 | 0.02(0.79)                                            | 1.00 <sup>F</sup> (0.13) | 0.02/1.00 <sup>F</sup> (0.07) | 1.00 <sup>F</sup> /1.00 <sup>F</sup> (0.01) |              |         |           |
| CmC                                             | 229 | -6525.88 | 0.02(0.84)                                            | 1.00 <sup>F</sup> (0.13) | 4.55/4.12(0.04)               |                                             | M2a_rel      | 0.05    | 0.8168    |
| CmD                                             | 230 | -6523.47 | 0.04(0.86)                                            | 8.81(0.01)               | 1.44/3.95(0.13)               |                                             | M3           | 4.88    | 0.0272    |
| <b>North American Transition as Foreground</b>  |     |          |                                                       |                          |                               |                                             |              |         |           |
| Br-site alt                                     | 228 | -6627.46 | 0.02(0.83)                                            | 1.00 <sup>F</sup> (0.15) | 0.02/1.42(0.02)               | 1.00 <sup>F</sup> /1.42(0.00)               | Br-site null | 0.01    | 0.9031    |
| Branch Site (null)                              | 227 | -6627.47 | 0.02(0.82)                                            | 1.00 <sup>F</sup> (0.15) | 0.02/1.00 <sup>F</sup> (0.03) | 1.00 <sup>F</sup> /1.00 <sup>F</sup> (0.00) |              |         |           |
| CmC                                             | 229 | -6525.39 | 0.02(0.84)                                            | 1.00 <sup>F</sup> (0.13) | 4.55/2.16(0.04)               |                                             | M2a_rel      | 1.03    | 0.3100    |
| CmD                                             | 230 | -6525.14 | 0.02(0.83)                                            | 4.42(0.04)               | 0.96/1.94(0.13)               |                                             | M3           | 1.54    | 0.2143    |
| <b>Mekong River Transition as Foreground</b>    |     |          |                                                       |                          |                               |                                             |              |         |           |
| Br-site alt                                     | 228 | -6627.71 | 0.02(0.85)                                            | 1.00 <sup>F</sup> (0.15) | 0.02/1.00(0.00)               | 1.00 <sup>F</sup> /1.00(0.00)               | Br-site null | 0.00    | 1.0000    |
| Br-site null                                    | 227 | -6627.71 | 0.02(0.85)                                            | 1.00 <sup>F</sup> (0.15) | 0.02/1.00 <sup>F</sup> (0.00) | 1.00 <sup>F</sup> /1.00 <sup>F</sup> (0.00) |              |         |           |
| CmC                                             | 229 | -6524.26 | 0.02(0.84)                                            | 1.00 <sup>F</sup> (0.13) | 4.56/0.00(0.04)               |                                             | M2a_rel      | 3.30    | 0.0693    |
| CmD                                             | 230 | -6525.69 | 1.00(0.13)                                            | 4.52(0.04)               | 0.03/0.00(0.84)               |                                             | M3           | 0.44    | 0.5071    |
| <b>South American Transition as Foreground</b>  |     |          |                                                       |                          |                               |                                             |              |         |           |
| Br-site alt                                     | 228 | -6617.67 | 0.02(0.82)                                            | 1.00 <sup>F</sup> (0.14) | 0.02/18.42(0.04)              | 1.00 <sup>F</sup> /18.42(0.01)              | Br-site null | 9.64    | 0.0019    |
| Br-site null                                    | 227 | -6622.49 | 0.02(0.75)                                            | 1.00 <sup>F</sup> (0.13) | 0.02/1.00 <sup>F</sup> (0.10) | 1.00 <sup>F</sup> /1.00 <sup>F</sup> (0.02) |              |         |           |
| CmC                                             | 229 | -6524.93 | 0.02(0.84)                                            | 1.00 <sup>F</sup> (0.13) | 4.36/9.67(0.04)               |                                             | M2aREL       | 1.95    | 0.1622    |
| CmD                                             | 230 | -6522.59 | 0.03(0.85)                                            | 6.86(0.02)               | 1.30/6.42(0.13)               |                                             | M3           | 6.63    | 0.0100    |

Note: lnL, ln likelihood; <sup>F</sup>,  $d_N/d_S$  estimate fixed at reported value; LRT, likelihood ratio test result; Br-site, Branch-site; CmC, Clade model C; CmD, Clade model D

**Table S6. Branch-sites and clade model analyses (PAML) comparing  $d_N/d_S$  estimates for the transitional branches of the world-wide croaker rhodopsin dataset using the maximum likelihood species tree**

| Partitions                       | np  | lnL      | Parameter Estimates: $d_N/d_S$ (proportion of sites)<br>(background $d_N/d_S$ / foreground $d_N/d_S$ ) |                          |                               | Null                                        | LRT          | p value |        |
|----------------------------------|-----|----------|--------------------------------------------------------------------------------------------------------|--------------------------|-------------------------------|---------------------------------------------|--------------|---------|--------|
| M2aREL                           | 230 | -6490.44 | 0.03(0.84)                                                                                             | 1.00 <sup>F</sup> (0.13) | 4.54(0.03)                    |                                             |              |         |        |
| M3                               | 231 | -6490.39 | 0.03(0.84)                                                                                             | 1.04(0.13)               | 4.65(0.03)                    |                                             |              |         |        |
| <b>All transitional branches</b> |     |          |                                                                                                        |                          |                               |                                             |              |         |        |
| Br-site alt                      | 230 | -6579.40 | 0.02(0.82)                                                                                             | 1.00 <sup>F</sup> (0.14) | 0.02/5.49(0.04)               | 1.00 <sup>F</sup> /5.49(0.01)               | Br-site null | 4.45    | 0.0349 |
| Br-site null                     | 229 | -6581.63 | 0.02(0.78)                                                                                             | 1.00 <sup>F</sup> (0.13) | 0.02/1.00 <sup>F</sup> (0.08) | 1.00 <sup>F</sup> /1.00 <sup>F</sup> (0.01) |              |         |        |
| CmC                              | 231 | -6489.73 | 0.03(0.84)                                                                                             | 1.00 <sup>F</sup> (0.13) | 4.64/2.33(0.03)               |                                             | M2aREL       | 1.43    | 0.2317 |
| CmD                              | 232 | -6486.78 | 0.03(0.86)                                                                                             | 8.71(0.01)               | 1.38/3.71(0.13)               |                                             | M3           | 7.21    | 0.0072 |
| <b>North American transition</b> |     |          |                                                                                                        |                          |                               |                                             |              |         |        |
| Br-site alt                      | 230 | -6586.12 | 0.02(0.83)                                                                                             | 1.00 <sup>F</sup> (0.15) | 0.02/1.42(0.02)               | 1.00 <sup>F</sup> /1.42(0.00)               | Br-site null | 0.01    | 0.9057 |
| Br-site null                     | 229 | -6586.13 | 0.02(0.82)                                                                                             | 1.00 <sup>F</sup> (0.15) | 0.02/1.00(0.02)               | 1.00 <sup>F</sup> /1.00 <sup>F</sup> (0.00) |              |         |        |
| CmC                              | 231 | -6489.95 | 0.03(0.84)                                                                                             | 1.00 <sup>F</sup> (0.13) | 4.55/2.19(0.03)               |                                             | M2aREL       | 0.98    | 0.3219 |
| CmD                              | 232 | -6490.10 | 0.04(0.86)                                                                                             | 8.75(0.01)               | 1.47/2.58(0.13)               |                                             | M3           | 0.57    | 0.4498 |
| <b>Mekong River transition</b>   |     |          |                                                                                                        |                          |                               |                                             |              |         |        |
| Br-site alt                      | 230 | -6586.36 | 0.02(0.85)                                                                                             | 1.00 <sup>F</sup> (0.15) | 0.02/1.00 <sup>F</sup> (0.00) | 1.00 <sup>F</sup> /1.00(0.00)               | Br-site null | 0.00    | 1.0000 |
| Br-site null                     | 229 | -6586.36 | 0.02(0.85)                                                                                             | 1.00 <sup>F</sup> (0.15) | 0.02/1.00 <sup>F</sup> (0.00) | 1.00 <sup>F</sup> /1.00 <sup>F</sup> (0.00) |              |         |        |
| CmC                              | 231 | -6488.84 | 0.03(0.84)                                                                                             | 1.00 <sup>F</sup> (0.13) | 4.56/0.00(0.03)               |                                             | M2aREL       | 3.20    | 0.0735 |
| CmD                              | 232 | -6490.12 | 0.04(0.86)                                                                                             | 8.74(0.01)               | 1.48/3.59(0.13)               |                                             | M3           | 0.54    | 0.4631 |
| <b>South American transition</b> |     |          |                                                                                                        |                          |                               |                                             |              |         |        |
| Br-site alt                      | 230 | -6575.55 | 0.02(0.82)                                                                                             | 1.00 <sup>F</sup> (0.14) | 0.02/23.12(0.03)              | 1.00 <sup>F</sup> /23.12(0.01)              | Br-site null | 9.52    | 0.0020 |
| Br-site null                     | 229 | -6580.31 | 0.02(0.72)                                                                                             | 1.00 <sup>F</sup> (0.12) | 0.02/1.00 <sup>F</sup> (0.13) | 1.00 <sup>F</sup> /1.00 <sup>F</sup> (0.02) |              |         |        |
| CmC                              | 231 | -6490.25 | 0.03(0.84)                                                                                             | 1.00 <sup>F</sup> (0.13) | 4.48/8.02(0.03)               |                                             | M2aREL       | 0.38    | 0.5370 |
| CmD                              | 232 | -6487.31 | 0.03(0.86)                                                                                             | 8.57(0.01)               | 1.40/5.78(0.13)               |                                             | M3           | 6.16    | 0.0130 |

Note: lnL, ln likelihood; <sup>F</sup>,  $d_N/d_S$  estimate fixed at reported value; LRT, likelihood ratio test result; Br-site, Branch-site; CmC, Clade model C; CmD, Clade model D

**Table S7. Branch-sites and clade model analyses (PAML) comparing  $d_N/d_S$  estimates for the transitional branches of the world-wide croaker rhodopsin dataset using the maximum likelihood rhodopsin gene tree**

| Partitions                            | np  | lnL      | Parameter Estimates: $d_N/d_S$ (proportion of sites)<br>(background $d_N/d_S$ / foreground $d_N/d_S$ )        | Null         | LRT  | p value |
|---------------------------------------|-----|----------|---------------------------------------------------------------------------------------------------------------|--------------|------|---------|
| M2aREL                                | 230 | -6206.98 | 0.02(0.84) 1.00 <sup>F</sup> (0.16) 8.94(0.01)                                                                |              |      |         |
| M3                                    | 231 | -6204.77 | 0.03(0.84) 1.21(0.15) 9.50(0.01)                                                                              |              |      |         |
| <b>All transitional branches</b>      |     |          |                                                                                                               |              |      |         |
| Br-site alt                           | 230 | -6271.17 | 0.02(0.82) 1.00 <sup>F</sup> (0.14) 0.02/6.30(0.03) 1.00 <sup>F</sup> /6.30(0.01)                             | Br-site null | 4.4  | 0.0359  |
| Br-site null                          | 229 | -6273.37 | 0.02(0.77) 1.00 <sup>F</sup> (0.14) 0.02/1.00 <sup>F</sup> (0.07) 1.00 <sup>F</sup> /1.00 <sup>F</sup> (0.01) |              |      |         |
| CmC                                   | 231 | -6206.35 | 0.02(0.84) 1.00 <sup>F</sup> (0.16) 9.25/3.26(0.01)                                                           | M2aREL       | 1.25 | 0.2635  |
| CmD                                   | 232 | -6200.74 | 0.03(0.84) 9.49(0.01) 1.15/3.12(0.15)                                                                         | M3           | 8.05 | 0.0045  |
| <b>North American (NA) transition</b> |     |          |                                                                                                               |              |      |         |
| Br-site alt                           | 230 | -6277.4  | 0.02(0.82) 1.00 <sup>F</sup> (0.15) 0.02/1.00(0.03) 1.00 <sup>F</sup> /1.00(0.01)                             | Br-site null | 0.00 | 1.0000  |
| Br-site null                          | 229 | -6277.4  | 0.02(0.82) 1.00 <sup>F</sup> (0.15) 0.02/1.00 <sup>F</sup> (0.03) 1.00 <sup>F</sup> /1.00 <sup>F</sup> (0.01) |              |      |         |
| CmC                                   | 231 | -6205.51 | 0.02(0.84) 1.00 <sup>F</sup> (0.16) 9.15/0.00(0.01)                                                           | M2aREL       | 2.94 | 0.0863  |
| CmD                                   | 232 | -6204.66 | 0.03(0.84) 9.50(0.01) 1.20/1.59(0.15)                                                                         | M3           | 0.21 | 0.6457  |
| <b>Mekong River transition</b>        |     |          |                                                                                                               |              |      |         |
| Br-site alt                           | 230 | -6277.64 | 0.02(0.84) 1.00 <sup>F</sup> (0.16) 0.02/1.00(0.00) 1.00 <sup>F</sup> /1.00(0.00)                             | Br-site null | 0.00 | 1.0000  |
| Br-site null                          | 229 | -6277.64 | 0.02(0.84) 1.00 <sup>F</sup> (0.16) 0.02/1.00 <sup>F</sup> (0.00) 1.00 <sup>F</sup> /1.00 <sup>F</sup> (0.00) |              |      |         |
| CmC                                   | 231 | -6206.32 | 0.02(0.84) 1.00 <sup>F</sup> (0.16) 9.04/0.00(0.01)                                                           | M2aREL       | 1.31 | 0.2519  |
| CmD                                   | 232 | -6204.23 | 0.03(0.85) 9.50(0.01) 1.20/2.88(0.15)                                                                         | M3           | 1.07 | 0.3006  |
| <b>South American (SA) transition</b> |     |          |                                                                                                               |              |      |         |
| Br-site alt                           | 230 | -6267.03 | 0.02(0.82) 1.00 <sup>F</sup> (0.15) 0.02/25.27(0.03) 1.00 <sup>F</sup> /25.27(0.01)                           | Br-site null | 10.3 | 0.0013  |
| Br-site null                          | 229 | -6272.18 | 0.02(0.72) 1.00 <sup>F</sup> (0.13) 0.02/1.00 <sup>F</sup> (0.12) 1.00 <sup>F</sup> /1.00 <sup>F</sup> (0.02) |              |      |         |
| CmC                                   | 231 | -6206.81 | 0.02(0.84) 1.00 <sup>F</sup> (0.16) 8.85/17.73(0.01)                                                          | M2aREL       | 0.34 | 0.5606  |
| CmD                                   | 232 | -6200.16 | 0.03(0.84) 9.47(0.01) 1.16/5.42(0.15)                                                                         | M3           | 9.21 | 0.0024  |

Note: lnL, ln likelihood; <sup>F</sup>,  $d_N/d_S$  estimate fixed at reported value; LRT, likelihood ratio test result; Br-site, Branch-site; CmC, Clade model C; CmD, Clade model D

**Table S8. Branch-sites and clade model analyses (PAML) comparing  $d_N/d_S$  estimates in different ecological partitions in the South American croaker rhodopsin dataset using the Bayesian species tree**

| Model                                                                  | np | lnL      | Parameter Estimates: $d_N/d_S$ (proportion of sites):<br>background $d_N/d_S$ / foreground $d_N/d_S$ | Null                                     | LRT   | p value  |
|------------------------------------------------------------------------|----|----------|------------------------------------------------------------------------------------------------------|------------------------------------------|-------|----------|
| <b>Unpartitioned null models</b>                                       |    |          |                                                                                                      |                                          |       |          |
| m0                                                                     | 92 | -3535.69 | 0.24(1.00)                                                                                           |                                          |       |          |
| M2aREL                                                                 | 95 | -3328.05 | 0.02(0.84) 1.00 <sup>F</sup> (0.14) 8.99(0.01)                                                       |                                          |       |          |
| M3                                                                     | 96 | -3326.68 | 0.03(0.86) 1.37(0.13) 13.34(0.01)                                                                    |                                          |       |          |
| <b>Freshwater clade and transitional branch</b>                        |    |          |                                                                                                      |                                          |       |          |
| Two-ratio                                                              | 93 | -3533.54 | 0.22/0.36(1.00)                                                                                      | m0                                       | 4.30  | 0.0381   |
| Br-site alt                                                            | 95 | -3360.78 | 0.02(0.84) 1.00 <sup>F</sup> (0.12) 0.02/6.28(0.04) 1.00/6.28(0.01)                                  | Br-site null                             | 15.92 | 0.0001   |
| Br-site null                                                           | 94 | -3368.74 | 0.01(0.81) 1.00 <sup>F</sup> (0.12) 0.01/1.00 <sup>F</sup> (0.07) 1.00/1.00 <sup>F</sup> (0.01)      |                                          |       |          |
| CmC                                                                    | 96 | -3327.21 | 0.02(0.84) 1.00 <sup>F</sup> (0.14) 9.81/5.42(0.02)                                                  | M2a                                      | 1.68  | 0.1949   |
| CmD                                                                    | 97 | -3323.74 | 0.01(0.80) 4.28(0.04) 0.40/1.44(0.16)                                                                | M3                                       | 5.88  | 0.0153   |
| <b>Transitional branch</b>                                             |    |          |                                                                                                      |                                          |       |          |
| Two-ratio                                                              | 93 | -3525.69 | 0.22/2.24(1.00)                                                                                      | m0                                       | 20.0  | < 0.0001 |
| Br-site alt                                                            | 95 | -3362.17 | 0.02(0.82) 1.00 <sup>F</sup> (0.12) 0.02/23.52(0.05) 1.00/23.52(0.01)                                | Br-site null                             | 12.66 | 0.0004   |
| Br-site null                                                           | 94 | -3368.50 | 0.01(0.70) 1.00 <sup>F</sup> (0.11) 0.01/1.00 <sup>F</sup> (0.16) 1.00/1.00 <sup>F</sup> (0.03)      |                                          |       |          |
| CmC                                                                    | 96 | -3328.03 | 0.02(0.84) 1.00 <sup>F</sup> (0.14) 8.94/10.95(0.01)                                                 | M2a                                      | 0.04  | 0.8415   |
| CmD                                                                    | 97 | -3317.23 | 0.00(0.77) 4.12(0.05) 0.39/6.91(0.19)                                                                | M3                                       | 18.9  | < 0.0001 |
| <b>Freshwater clade only</b>                                           |    |          |                                                                                                      |                                          |       |          |
| Two-ratio                                                              | 93 | -3535.64 | 0.25/0.23(1.00)                                                                                      | m0                                       | 0.10  | 0.7518   |
| Br-site alt                                                            | 95 | -3366.34 | 0.02(0.85) 1.00 <sup>F</sup> (0.14) 0.02/10.75(0.01) 1.00/10.75(0.00)                                | Br-site null                             | 13.42 | 0.0002   |
| Br-site null                                                           | 94 | -3373.05 | 0.02(0.84) 1.00 <sup>F</sup> (0.14) 0.02/1.00 <sup>F</sup> (0.02) 1.00/1.00 <sup>F</sup> (0.00)      |                                          |       |          |
| CmC                                                                    | 96 | -3327.01 | 0.02(0.84) 1.00 <sup>F</sup> (0.14) 9.73/4.93(0.01)                                                  | M2a                                      | 2.08  | 0.1492   |
| CmD                                                                    | 97 | -3326.67 | 0.03(0.86) 13.32(0.01) 1.35/1.42(0.13)                                                               | M3                                       | 0.02  | 0.8875   |
| <b>Marine lineages only</b>                                            |    |          |                                                                                                      |                                          |       |          |
| Br-site alt                                                            | 95 | -3337.09 | 0.02(0.83) 1.00 <sup>F</sup> (0.15) 0.02/9.53(0.02) 1.00/9.53(0.00)                                  | Br-site null                             | 74.26 | < 0.0001 |
| Br-site null                                                           | 94 | -3374.22 | 0.02(0.85) 1.00 <sup>F</sup> (0.15) 0.02/1.00 <sup>F</sup> (0.00) 1.00/1.00 <sup>F</sup> (0.00)      |                                          |       |          |
| <b>Transitional branch and freshwater clade (separate foregrounds)</b> |    |          |                                                                                                      |                                          |       |          |
| Two-ratio                                                              | 94 | -3525.68 | 0.21/2.23/0.23(1.00)                                                                                 | m0                                       | 20.02 | < 0.0001 |
| CmC                                                                    | 97 | -3327.01 | 0.02(0.84) 1.00 <sup>F</sup> (0.14) 9.74/9.48/4.93(0.01)                                             | M2a                                      | 2.08  | 0.1492   |
| CmD                                                                    | 98 | -3315.91 | 0.01(0.78) 4.19(0.05) 0.36/8.21/0.72(0.17)                                                           | M3                                       | 21.54 | < 0.0001 |
|                                                                        |    |          |                                                                                                      | Freshwater clade and transitional branch | 15.66 | < 0.0001 |
|                                                                        |    |          |                                                                                                      | Transitional branch                      | 2.64  | 0.1042   |
|                                                                        |    |          |                                                                                                      | Freshwater clade only                    | 21.52 | < 0.0001 |

Note: lnL, ln likelihood; <sup>F</sup>,  $d_N/d_S$  estimate fixed at reported value; LRT, likelihood ratio test result; Br-site, Branch-site; CmC, Clade model C; CmD, Clade model D

**Table S9. Branch-sites analyses (PAML) comparing  $d_N/d_S$  estimates in different ecological partitions in the control gene dataset using the Bayesian species tree**

| Foreground                       | np | lnL      | Parameter Estimates: $d_N/d_S$ (proportion of sites)<br>(background $d_N/d_S$ / foreground $d_N/d_S$ ) |            |                  |                  | LRT   | p value  |
|----------------------------------|----|----------|--------------------------------------------------------------------------------------------------------|------------|------------------|------------------|-------|----------|
| <b>Rh1</b>                       |    |          |                                                                                                        |            |                  |                  |       |          |
| marine                           | 62 | -2587.14 | 0.03(0.86)                                                                                             | 1.00(0.12) | 0.03/10.23(0.02) | 1.00/10.23(0.00) | 54.38 | < 0.0001 |
| marine (null)                    | 61 | -2614.33 | 0.03(0.88)                                                                                             | 1.00(0.12) | 0.03/1.00(0.00)  | 1.00/1.00(0.00)  |       |          |
| Transitional branch              | 62 | -2604.32 | 0.02(0.84)                                                                                             | 1.00(0.10) | 0.02/18.53(0.06) | 1.00/18.53(0.01) | 8.97  | 0.0027   |
| Transitional branch (null)       | 61 | -2608.81 | 0.02(0.69)                                                                                             | 1.00(0.09) | 0.02/1.00(0.20)  | 1.00/1.00(0.02)  |       |          |
| South American freshwater        | 62 | -2609.18 | 0.03(0.88)                                                                                             | 1.00(0.10) | 0.03/7.55(0.02)  | 1.00/7.55(0.00)  | 8.10  | 0.0044   |
| South American freshwater (null) | 61 | -2613.24 | 0.03(0.87)                                                                                             | 1.00(0.10) | 0.03/1.00(0.03)  | 1.00/1.00(0.00)  |       |          |
| <b>Rag1</b>                      |    |          |                                                                                                        |            |                  |                  |       |          |
| marine                           | 62 | -3365.04 | 0.04(0.89)                                                                                             | 1.00(0.09) | 0.04/3.51(0.01)  | 1.00/3.51(0.00)  | 6.29  | 0.0121   |
| marine (null)                    | 61 | -3368.19 | 0.03(0.88)                                                                                             | 1.00(0.10) | 0.03/1.00(0.02)  | 1.00/1.00(0.00)  |       |          |
| Transitional branch              | 62 | -3367.71 | 0.03(0.58)                                                                                             | 1.00(0.07) | 0.03/1.00(0.31)  | 1.00/1.00(0.04)  | 0.00  | 1.0000   |
| Transitional branch (null)       | 61 | -3367.71 | 0.03(0.58)                                                                                             | 1.00(0.07) | 0.03/1.00(0.31)  | 1.00/1.00(0.04)  |       |          |
| South American freshwater        | 62 | -3368.11 | 0.03(0.87)                                                                                             | 1.00(0.11) | 0.03/1.00(0.02)  | 1.00/1.00(0.00)  | 0.00  | 1.0000   |
| South American freshwater (null) | 61 | -3368.11 | 0.03(0.87)                                                                                             | 1.00(0.11) | 0.03/1.00(0.02)  | 1.00/1.00(0.00)  |       |          |
| <b>EGR1</b>                      |    |          |                                                                                                        |            |                  |                  |       |          |
| marine                           | 62 | -1793.39 | 0.00(0.93)                                                                                             | 1.00(0.07) | 0.00/1.00(0.00)  | 1.00/1.00(0.00)  | 0.00  | 1.0000   |
| marine (null)                    | 61 | -1793.39 | 0.00(0.93)                                                                                             | 1.00(0.07) | 0.00/1.00(0.00)  | 1.00/1.00(0.00)  |       |          |
| Transitional branch              | 62 | -1793.39 | 0.00(0.93)                                                                                             | 1.00(0.07) | 0.00/1.00(0.00)  | 1.00/1.00(0.00)  | 0.00  | 1.0000   |
| Transitional branch (null)       | 61 | -1793.39 | 0.00(0.93)                                                                                             | 1.00(0.07) | 0.00/1.00(0.00)  | 1.00/1.00(0.00)  |       |          |
| South American freshwater        | 62 | -1792.15 | 0.00(0.91)                                                                                             | 1.00(0.05) | 0.00/1.00(0.04)  | 1.00/1.00(0.00)  | 0.00  | 1.0000   |
| South American freshwater (null) | 61 | -1792.15 | 0.00(0.91)                                                                                             | 1.00(0.05) | 0.00/1.00(0.04)  | 1.00/1.00(0.00)  |       |          |
| <b>EGR2</b>                      |    |          |                                                                                                        |            |                  |                  |       |          |
| marine                           | 62 | -1867.65 | 0.05(0.96)                                                                                             | 1.00(0.04) | 0.05/4.99(0.00)  | 1.00/4.99(0.00)  | 0.00  | 1.0000   |
| marine (null)                    | 61 | -1867.65 | 0.05(0.96)                                                                                             | 1.00(0.04) | 0.05/1.00(0.00)  | 1.00/1.00(0.00)  |       |          |
| Transitional branch              | 62 | -1867.65 | 0.05(0.89)                                                                                             | 1.00(0.03) | 0.05/2.06(0.08)  | 1.00/2.06(0.00)  | 0.00  | 1.0000   |
| Transitional branch (null)       | 61 | -1867.65 | 0.05(0.95)                                                                                             | 1.00(0.04) | 0.05/1.00(0.01)  | 1.00/1.00(0.00)  |       |          |
| South American freshwater        | 62 | -1867.65 | 0.05(0.96)                                                                                             | 1.00(0.04) | 0.05/1.00(0.00)  | 1.00/1.00(0.00)  | 0.00  | 1.0000   |
| South American freshwater (null) | 61 | -1867.65 | 0.05(0.96)                                                                                             | 1.00(0.04) | 0.05/1.00(0.00)  | 1.00/1.00(0.00)  |       |          |

Note: lnL, ln likelihood; LRT, likelihood ratio test result;

**Table S10. Clade model analyses (PAML) comparing  $d_N/d_S$  estimates in different ecological partitions in the control gene dataset using the Bayesian species tree**

| Foreground                | np | lnL      | Parameter Estimates: $d_N/d_S$ (proportion of sites)<br>(background $d_N/d_S$ / foreground $d_N/d_S$ ) | null   | LRT   | p value |
|---------------------------|----|----------|--------------------------------------------------------------------------------------------------------|--------|-------|---------|
| <b>Rh1</b>                |    |          |                                                                                                        |        |       |         |
| m2aREL (null)             | 62 | -2577.2  | 0.03(0.87) 1.00(0.11) 8.95(0.02)                                                                       |        |       |         |
| m3 (null)                 | 63 | -2576.12 | 0.05(0.90) 1.61(0.09) 12.70(0.01)                                                                      |        |       |         |
| CmC / Marine lineages     | 63 | -2576.63 | 0.03(0.87) 1.00(0.11) 5.91/9.92(0.02)                                                                  | M2aREL | 1.15  | 0.2843  |
| CmD / Marine lineages     | 64 | -2570.42 | 0.03(0.86) 5.73(0.03) 2.27/0.39(0.12)                                                                  | M3     | 11.41 | 0.0007  |
| CmC / Transitional branch | 63 | -2577.19 | 0.03(0.87) 1.00(0.11) 8.89/10.25(0.02)                                                                 | M2aREL | 0.02  | 0.8846  |
| CmD / Transitional branch | 64 | -2569.00 | 0.03(0.85) 7.43(0.02) 0.68/11.88(0.13)                                                                 | M3     | 14.25 | 0.0002  |
| CmC / Freshwater clade    | 63 | -2576.48 | 0.03(0.87) 1.00(0.11) 9.78/5.32(0.02)                                                                  | M2aREL | 1.43  | 0.2318  |
| CmD / Freshwater clade    | 64 | -2575.34 | 0.04(0.90) 9.59(0.01) 1.18/2.11(0.09)                                                                  | M3     | 1.56  | 0.2111  |
| <b>Rag1</b>               |    |          |                                                                                                        |        |       |         |
| m2aREL (null)             | 62 | -3367.07 | 0.04(0.89) 1.00(0.08) 2.08(0.02)                                                                       |        |       |         |
| m3 (null)                 | 63 | -3367.04 | 0.04(0.89) 0.80(0.08) 1.89(0.04)                                                                       |        |       |         |
| CmC / Marine lineages     | 63 | -3364.94 | 0.04(0.89) 1.00(0.10) 0.00/3.55(0.01)                                                                  | M2aREL | 4.26  | 0.0389  |
| CmD / Marine lineages     | 64 | -3364.92 | 0.04(0.89) 1.04(0.09) 0.00/3.55(0.01)                                                                  | M3     | 4.24  | 0.0396  |
| CmC / Transitional branch | 63 | -3367.03 | 0.04(0.90) 1.00(0.08) 2.08/0.00(0.02)                                                                  | M2aREL | 0.08  | 0.7740  |
| CmD / Transitional branch | 64 | -3366.56 | 0.09(0.48) 1.40(0.09) 0.00/0.74(0.43)                                                                  | M3     | 0.96  | 0.3269  |
| CmC / Freshwater clade    | 63 | -3365.07 | 0.04(0.89) 1.00(0.10) 3.55/0.00(0.01)                                                                  | M2aREL | 4.01  | 0.0453  |
| CmD / Freshwater clade    | 64 | -3365.05 | 0.04(0.89) 1.05(0.09) 3.56/0.00(0.01)                                                                  | M3     | 3.98  | 0.0460  |
| <b>EGR1</b>               |    |          |                                                                                                        |        |       |         |
| m2aREL (null)             | 62 | -1792.98 | 0.00(0.91) 1.00(0.00) 0.69(0.09)                                                                       |        |       |         |
| m3 (null)                 | 63 | -1792.98 | 0.00(0.20) 0.00(0.72) 0.69(0.09)                                                                       |        |       |         |
| CmC / Marine lineages     | 63 | -1792.03 | 0.00(0.00) 1.00(0.05) 0.03/0.00(0.95)                                                                  | M2aREL | 1.89  | 0.1696  |
| CmD / Marine lineages     | 64 | -1791.97 | 0.00(0.00) 0.85(0.06) 0.03/0.00(0.94)                                                                  | M3     | 2.04  | 0.1527  |
| CmC / Transitional branch | 63 | -1792.86 | 0.00(0.91) 1.00(0.00) 0.70/0.00(0.09)                                                                  | M2aREL | 0.24  | 0.6223  |
| CmD / Transitional branch | 64 | -1792.86 | 0.00(0.49) 0.00(0.42) 0.70/0.00(0.09)                                                                  | M3     | 0.26  | 0.6068  |
| CmC / Freshwater clade    | 63 | -1791.96 | 0.00(0.00) 1.00(0.05) 0.00/0.04(0.95)                                                                  | M2aREL | 2.04  | 0.1534  |
| CmD / Freshwater clade    | 64 | -1791.89 | 0.00(0.00) 0.85(0.06) 0.00/0.03(0.94)                                                                  | M3     | 2.19  | 0.1390  |
| <b>EGR2</b>               |    |          |                                                                                                        |        |       |         |
| m2aREL (null)             | 62 | -1866.40 | 0.06(0.99) 1.00(0.00) 4.01(0.01)                                                                       |        |       |         |
| m3 (null)                 | 63 | -1866.40 | 0.06(0.99) 4.01(0.01) 4.01(0.00)                                                                       |        |       |         |
| CmC / Marine lineages     | 63 | -1866.19 | 0.06(0.99) 1.00(0.00) 6.00/3.12(0.01)                                                                  | M2aREL | 0.42  | 0.5185  |
| CmD / Marine lineages     | 64 | -1866.19 | 0.06(0.40) 0.06(0.59) 6.00/3.12(0.01)                                                                  | M3     | 0.42  | 0.5185  |
| CmC / Transitional branch | 63 | -1866.40 | 0.06(0.99) 1.00(0.00) 4.01/4.49(0.01)                                                                  | M2aREL | 0.00  | 1.0000  |
| CmD / Transitional branch | 64 | -1866.40 | 0.06(0.92) 0.06(0.07) 4.01/3.14(0.01)                                                                  | M3     | 0.00  | 1.0000  |



|                        |    |          |            |            |                 |        |      |        |
|------------------------|----|----------|------------|------------|-----------------|--------|------|--------|
| CmC / Freshwater clade | 63 | -1866.19 | 0.06(0.99) | 1.00(0.00) | 3.12/6.00(0.01) | M2aREL | 0.42 | 0.5185 |
| CmD / Freshwater clade | 64 | -1866.19 | 0.06(0.31) | 0.06(0.68) | 3.12/6.00(0.01) | M3     | 0.42 | 0.5185 |

Note: lnL, ln likelihood; LRT, likelihood ratio test result; CmC, Clade model C; CmD, Clade model D

**Table S11. Clade model analyses (PAML) comparing  $d_N/d_S$  on the South American transitional branch of the South American rhodopsin dataset with and without highly positively selected sites removed using the Bayesian species tree**

| Model                                                                                                                                  | np | lnL      | Parameter Estimates: dN/dS (proportion of sites)<br>(background dN/dS / Foreground dN/dS) |                          |                  | Null        | LRT | p value |          |
|----------------------------------------------------------------------------------------------------------------------------------------|----|----------|-------------------------------------------------------------------------------------------|--------------------------|------------------|-------------|-----|---------|----------|
| <b>Full rhodopsin dataset</b>                                                                                                          |    |          |                                                                                           |                          |                  |             |     |         |          |
| <b>M3</b>                                                                                                                              | 96 | -3326.68 | 0.03(0.86)                                                                                | 1.37(0.13)               | 13.34(0.01)      |             |     |         |          |
| <b>M3 - 4 site classes</b>                                                                                                             | 98 | -3315.31 | 0.00(0.74)                                                                                | 0.40(0.20)               | 2.63(0.05)       | 13.64(0.01) | M3  | 22.74   | < 0.0001 |
| <b>M2aREL</b>                                                                                                                          | 95 | -3328.05 | 0.02(0.84)                                                                                | 1.00 <sup>F</sup> (0.14) | 8.99(0.01)       |             |     |         |          |
| <b>CmC</b>                                                                                                                             | 96 | -3328.03 | 0.02(0.84)                                                                                | 1.00 <sup>F</sup> (0.14) | 8.94/10.95(0.01) |             | M2a | 0.04    | 0.8415   |
| <b>CmD</b>                                                                                                                             | 97 | -3317.25 | 0.00(0.77)                                                                                | 4.12(0.05)               | 0.39/6.91(0.19)  |             | M3  | 18.86   | < 0.0001 |
|                                                                                                                                        |    |          |                                                                                           |                          |                  |             | CmC | 21.56   | < 0.0001 |
| <b>Rhodopsin dataset with sites 165 and 214 removed (sites in 4<sup>th</sup> site class in the M3 analysis with four site classes)</b> |    |          |                                                                                           |                          |                  |             |     |         |          |
| <b>M3</b>                                                                                                                              | 96 | -3145.94 | 0.00(0.75)                                                                                | 0.40(0.20)               | 2.63(0.05)       |             |     |         |          |
| <b>M3 - 4 site classes</b>                                                                                                             | 98 | -3145.94 | 0.00(0.75)                                                                                | 0.40(0.20)               | 2.63(0.05)       | 3.82(0.00)  | M3  | 0.00    | 1.0000   |
| <b>M2aREL</b>                                                                                                                          | 95 | -3150.45 | 0.02(0.85)                                                                                | 1.00 <sup>F</sup> (0.11) | 3.05(0.04)       |             |     |         |          |
| <b>CmC</b>                                                                                                                             | 96 | -3145.42 | 0.01(0.81)                                                                                | 1.00 <sup>F</sup> (0.11) | 0.24/14.76(0.08) |             | M2a | 10.06   | 0.0015   |
| <b>CmD</b>                                                                                                                             | 97 | -3131.94 | 0.00(0.75)                                                                                | 2.76(0.05)               | 0.34/6.32(0.20)  |             | M3  | 28.04   | < 0.0001 |

Note: lnL, ln likelihood; <sup>F</sup>,  $d_N/d_S$  estimate fixed at reported value; LRT, likelihood ratio test result; CmC, Clade model C; CmD, Clade model D

**Table S12. Substitutions on the South American transitional branch from marginal ancestral reconstructions and the frequency of their occurrence on other branches in the tree**

| Substitution on transitional branch (WAG) | WAG (PPm PPf) | Dayhoff (PPm PPf) | JTT (PPm PPf) | M0 (PPm PPf)   | Number of substitutions at the same site | Number of identical substitutions | Conserved in the freshwater clade (*) |
|-------------------------------------------|---------------|-------------------|---------------|----------------|------------------------------------------|-----------------------------------|---------------------------------------|
| S33N                                      | 1 1           | 1 1               | 1 1           | 0.999 0.998    | 15                                       | 13                                |                                       |
| G39A                                      | 1 0.794       | 1 0.792           | 1 0.794       | 1 1(G)         | 2                                        | 2                                 |                                       |
| F50L                                      | 1 0.901       | 1 0.797           | 1 0.924       | 1(L) 1         | 6                                        | 1                                 |                                       |
| F52L                                      | 1 0.999       | 1 0.999           | 1 0.999       | 1 0.992(F)     | 3                                        | 1                                 |                                       |
| L63I                                      | 1 1           | 1 1               | 1 1           | 1 0.999        | 4                                        | 3                                 | *                                     |
| L119F                                     | 1 1           | 1 1               | 1 1           | 0.999 0.997    | 1                                        | 1                                 | *                                     |
| E122I                                     | 1 1           | 1 1               | 1 1           | 1 0.994        | 1                                        | 1                                 | *                                     |
| S124A                                     | 1 0.999       | 1 0.999           | 1 0.999       | 1 0.999        | 3                                        | 3                                 | *                                     |
| G158A                                     | 1 1           | 1 1               | 1 1           | 1 0.999        | 14                                       | 8                                 | *                                     |
| F159L                                     | 1 1           | 1 1               | 1 1           | 1 1            | 3                                        | 2                                 | *                                     |
| S165V                                     | 0.996 0.805   | 0.995 0.901       | 0.996 0.801   | 0.363 0.605(F) | 14                                       | 1                                 |                                       |
| V169G                                     | 1 1           | 1 1               | 1 1           | 1 1            | 17                                       | 1                                 | *                                     |
| V173I                                     | 1 0.999       | 1 0.999           | 1 0.999       | 1 0.995        | 7                                        | 2                                 |                                       |
| V209T                                     | 1 1           | 1 1               | 1 1           | 0.851 0.997    | 21                                       | 3                                 | *                                     |
| V214T                                     | 1 1           | 1 1               | 1 1           | 0.85 0.998     | 33                                       | 4                                 |                                       |
| V218I                                     | 1 0.999       | 1 0.999           | 1 0.999       | 0.929 0.999    | 16                                       | 12                                |                                       |
| V259I                                     | 1 0.999       | 1 0.999           | 1 0.999       | 0.93 0.997     | 13                                       | 6                                 | *                                     |
| F261Y                                     | 1 0.999       | 1 0.999           | 1 1           | 1 0.999        | 1                                        | 1                                 | *                                     |
| E282D                                     | 1 1           | 1 1               | 1 1           | 1 0.999        | 2                                        | 1                                 |                                       |
| M304A                                     | 0.998 1       | 0.997 1           | 0.998 1       | 0.999 0.998    | 6                                        | 4                                 |                                       |

Note: PPm, best supported amino acid identity in marine ancestor; PPf, best supported amino acid identity in freshwater ancestor; If the identity differs from the identity according to the WAG reconstruction the alternative amino acid is shown in parentheses

**Table S13. Peak spectral sensitivity of croaker rhodopsin from the literature and replicate spectroscopic assays of ancestrally reconstructed rhodopsin sequences**

| Pigment                                             | Spectral sensitivity of rhodopsin  |
|-----------------------------------------------------|------------------------------------|
| Bovine rhodopsin                                    | 498.7, 498.8, 498.3                |
| Bovine rhodopsin (A124S)                            | 496.4 (Castiglione and Chang 2018) |
| Bovine rhodopsin (L119F, E122I, F261Y)              | 505.6, 505.7, 505.6                |
| Ancestral marine croaker rhodopsin                  | 498.1, 497.3, 499.6                |
| Ancestral freshwater croaker rhodopsin              | 503.8, 504.5, 504.6                |
| <b>Published MSP estimates of croaker rhodopsin</b> |                                    |
| <i>Cynoscion regalis</i>                            | 496.0 (Beatty 1973)                |
| <i>Micropogon undulatus</i>                         | 496.5 (Beatty 1973)                |
| <i>Leiostomus xanthurus</i>                         | 499.0 (Beatty 1973)                |

**Table S14. Primers used in this study**

| <b>Primer name</b> | <b>Sequence (5' to 3')</b>    | <b>Gene</b> | <b>Reference</b>      |
|--------------------|-------------------------------|-------------|-----------------------|
| RH 193F            | CNTATGAATAYCCTCAGTACTACC      | rh1         | Chen et al. (2003)    |
| RH 1039R           | TGCTTGTTTCATGCAGATGTAGA       | rh1         | Chen et al. (2003)    |
| Rho124F            | GCCTACATGTTCTTYCTCATC         | rh1         | this study            |
| Rho934R            | GCTTGTTTCATGCAGATGTA          | rh1         | this study            |
| E1 225F            | CCTGAYATCCCTTCAACTGTG         | egr 1       | Lo et al. (2015)      |
| E1 284F            | CCCCCATCTCYTACACAGG           | egr 1       | Lo et al. (2015)      |
| E1 290F            | TMTCTTACACAGGCCGYTTCAC        | egr 1       | Lo et al. (2015)      |
| E1 1104R           | CGCAGGTGGATCTTRGTGTG          | egr 1       | Lo et al. (2015)      |
| E1 1118R           | CTTCTTGTCCTTCTGCCGYAGRT       | egr 1       | Lo et al. (2015)      |
| E2B ex1PcoF        | CYAAAACTTTGGAGAAAAGTGC        | egr 2       | Lo et al. (2015)      |
| E2B ex2intR2       | ACTGGGARTCGATGGAGAACT         | egr 2       | Lo et al. (2015)      |
| E1B 1117R          | AGGTGGATTTTGGTGTGTCTYTT       | egr 2       | Lo et al. (2015)      |
| E2B 1121R          | CCTCAGGTGGATTTTAGTGTGTC       | egr 2       | Lo et al. (2015)      |
| Rag1 f2            | CTGAGCTGCAGTCAGTACCATAAGATGT  | Rag1        | Lopez et al. (2004)   |
| Rag1 r1            | GTGTAGAGCCAGTGGTGYTT          | Rag1        | Lopez et al. (2004)   |
| GLUDGL             | CGAAGCTTGACTTGAARAACCAAYCGTTG | cyt b       | Ward et al. (2009)    |
| cyt bR             | CTCCGATCTTCGGATTACAAG         | cyt b       | Ward et al. (2009)    |
| co1fishF1          | TCAACYAATCAYAAAAGATATYGGCAC   | coi         | Baldwin et al. (2009) |
| co1fishR1          | ACTTCYGGGTGRCCRAARAATCA       | coi         | Baldwin et al. (2009) |

**Table S15. Genbank accession numbers and museum catalog numbers for sequences used in phylogenetic reconstructions and selection analyses.**

| Species                                  | taxa code | Isolate number | Voucher number | cyt b    | COI      | RAG1     | RHI      | EGR1     | EGR2     | Dataset usage |
|------------------------------------------|-----------|----------------|----------------|----------|----------|----------|----------|----------|----------|---------------|
| <i>Cynoscion acoupa</i>                  | 1         | 480            | NA             | MT879777 |          | MT879894 | MT879935 | MT879852 | MT879975 |               |
| <i>Cynoscion albus</i>                   | 2         | 13730          | ROM T13765     | MT879778 | MT879814 | MT879895 | MT879936 | MT879853 | MT879976 | Rho           |
| <i>Cynoscion arenarius</i>               | 3         | 11630          | NA             | MT879779 | MT879815 | MT879896 | MT879937 | MT879854 | MT879977 | Rho           |
| <i>Cynoscion nebulosus</i>               | 4         | 11628          | NA             |          | MT879816 | MT879897 | MT879938 | MT879855 | MT879978 | Rho           |
| <i>Cynoscion nothus</i>                  | 5         | 11626          | NA             | MT879780 |          | MT879898 | MT879939 | MT879856 |          | Rho           |
| <i>Cynoscion praedatorius</i>            | 6         | 13731          | ROM T13978     | MT879781 | MT879817 | MT879899 | MT879940 | MT879857 | MT879979 |               |
| <i>Isopisthus parvipinnis</i>            | 7         | 10532          | ROM T7713      | MT879782 | MT879818 | MT879900 | MT879941 | MT879858 | MT879980 | Rho           |
| <i>Larimus fasciatus</i>                 | 8         | 11625          | NA             | MT879783 | MT879819 | MT879901 | MT879942 | MT879859 |          | Rho SAC       |
| <i>Macrodon ancylodon</i>                | 9         | 10534          | ROM T7717      | MT879784 |          | MT879902 | MT879943 | MT879860 | MT879981 |               |
| <i>Menticirrhus paitensis</i>            | 10        | 13732          | ROM T13731     | MT879785 | MT879820 | MT879903 | MT879944 | MT879861 | MT879982 | Rho           |
| <i>Menticirrhus</i> sp. 1                | 11        | 10531          | NA             | MT879786 | MT879821 | MT879904 | MT879945 | MT879862 | MT879983 | Rho           |
| <i>Micropogonias fumieri</i>             | 12        | 10540          | ROM T8290      | MT879787 |          | MT879905 | MT879946 | MT879863 | MT879984 |               |
| <i>Nebris microps</i>                    | 13        | 10539          | ROM T7728      | MT879788 | MT879822 | MT879906 | MT879947 | MT879864 | MT879985 |               |
| <i>Nebris</i> sp. 1                      | 14        | 13733          | ROM T13741     | MT879789 | MT879823 | MT879907 | MT879948 | MT879865 | MT879986 | Rho SAC Con   |
| <i>Ophioscion scierus</i>                | 15        | 13734          | ROM T13732     | MT879790 | MT879824 | MT879908 | MT879949 | MT879866 | MT879987 | Rho SAC Con   |
| <i>Ophioscion</i> sp. 1                  | 16        | 13735          | ROM T08723     | MT879791 | MT879825 | MT879909 | MT879950 | MT879867 |          | Rho SAC       |
| <i>Pachypops fourcroy</i>                | 17        | 11599          | ANSP 40562     | MT879792 | MT879826 | MT879910 | MT879951 | MT879868 | MT879988 |               |
| <i>Pachypops</i> sp. 1                   | 18        | 11601          | ANSP 197648    | MT879793 | MT879827 | MT879911 | MT879952 | MT879869 |          | Rho SAC       |
| <i>Pachyurus bonariensis</i>             | 19        | 11595          | NA             | MT879794 | MT879828 | MT879912 | MT879953 | MT879870 | MT879989 |               |
| <i>Pachyurus</i> cf. <i>paucirastrus</i> | 20        | 11596          | ANSP 199599    | MT879795 | MT879829 | MT879913 | MT879954 | MT879871 | MT879990 | Rho SAC Con   |
| <i>Pachyurus junki</i>                   | 21        | 11597          | ANSP 193039    | MT879796 | MT879830 | MT879914 | MT879955 | MT879872 |          |               |
| <i>Pachyurus junki</i>                   | 22        | 11604          | ANSP 198701    | MT879797 | MT879831 | MT879915 | MT879956 | MT879873 |          | Rho SAC       |
| <i>Pachyurus schomburgkii</i>            | 23        | 528            | NA             |          | MT879832 | MT879916 | MT879957 | MT879874 | MT879991 | Rho SAC       |
| <i>Paralanchurus dumerilii</i>           | 24        | 13736          | ROM T13891     | MT879798 | MT879833 | MT879917 | MT879958 | MT879875 | MT879992 |               |
| <i>Paralanchurus dumerilii</i>           | 25        | 13737          | ROM T13728     | MT879799 | MT879834 | MT879918 | MT879959 | MT879876 | MT879993 | Rho SAC Con   |
| <i>Paralanchurus</i> sp. 1               | 26        | 10538          | ROM T7723      | MT879800 | MT879835 | MT879919 | MT879960 | MT879877 | MT879994 | Rho SAC Con   |
| <i>Petilipinnis grunniens</i>            | 27        | 11591          | ANSP 187423    | MT879801 | MT879836 | MT879920 | MT879961 | MT879878 | MT879995 | Rho SAC Con   |
| <i>Plagioscion auratus</i>               | 28        | 11602          | ANSP 197653    | MT879802 | MT879837 | MT879921 | MT879962 | MT879879 | MT879996 |               |
| <i>Plagioscion montei</i>                | 29        | 698            | NA             | MT879803 | MT879838 | MT879922 | MT879963 | MT879880 | MT879997 | Rho SAC Con   |
| <i>Plagioscion squamosissimus</i>        | 30        | 448            | NA             | MT879804 | MT879839 | MT879923 | MT879964 | MT879881 | MT879998 |               |
| <i>Plagioscion squamosissimus</i>        | 31        | 447            | NA             | MT879805 | MT879840 | MT879924 | MT879965 | MT879882 | MT879999 | Rho SAC Con   |
| <i>Plagioscion squamosissimus</i>        | 32        | 728            | SIUC 37984     |          | MT879841 | MT879925 | MT879966 | MT879883 | MT880000 |               |
| <i>Plagioscion squamosissimus</i>        | 33        | 377            | NA             | MT879806 | MT879842 | MT879926 |          | MT879884 | MT880001 |               |
| <i>Plagioscion squamosissimus</i>        | 34        | 529            | NA             |          | MT879843 | MT879927 |          | MT879885 | MT880002 |               |
| <i>Plagioscion squamosissimus</i>        | 35        | 632            | INHS 54286     |          | MT879844 | MT879928 |          | MT879886 |          |               |
| <i>Pogonias cromis</i>                   | 36        | 11634          | NA             | MT879807 | MT879845 | MT879929 | MT879967 | MT879887 | MT880003 | Rho           |
| <i>Sciaenops ocellatus</i>               | 37        | 11629          | NA             |          | MT879846 |          | MT879968 |          |          |               |
| <i>Stellifer chrysoleuca</i>             | 38        | 13738          | ROM T13888     | MT879808 | MT879847 | MT879930 | MT879969 | MT879888 | MT880004 | Rho SAC Con   |
| <i>Stellifer lanceolatus</i>             | 39        | 11631          | NA             | MT879809 | MT879848 | MT879931 | MT879970 | MT879889 |          | Rho SAC       |
| <i>Stellifer</i> sp. 1                   | 40        | 13739          | ROM T13734     | MT879810 | MT879849 | MT879932 | MT879971 | MT879890 | MT880005 | Rho SAC Con   |
| <i>Stellifer</i> sp. 2                   | 41        | 10536          | ROM T7720      | MT879811 |          | MT879933 | MT879972 | MT879891 | MT880006 | Rho SAC       |

|                                |    |       |           |          |          |          |          |          |          |             |
|--------------------------------|----|-------|-----------|----------|----------|----------|----------|----------|----------|-------------|
| <i>Stellifer stellifer</i>     | 42 | 10535 | ROM T7719 | MT879812 | MT879850 | MT879934 | MT879973 | MT879892 | MT880007 | Rho SAC Con |
| <i>Umbrina sp. 1</i>           | 43 | 10530 | NA        | MT879813 | MT879851 |          | MT879974 | MT879893 | MT880008 | Rho SAC     |
| <i>Aplodinotus grunniens</i>   | 44 | NA    |           | KP722606 | KP722699 | KP722882 | KP722970 | KP722788 | KP723062 | Rho         |
| <i>Argyrosomus japonicus</i>   | 45 | NA    |           | KP722607 | KP722700 | KP722883 | KP722971 | KP722789 | KP723063 | Rho         |
| <i>Argyrosomus regius</i>      | 46 | NA    |           | KP722608 | KP722701 | KP722884 | KP722972 | KP722790 | KP723064 | Rho         |
| <i>Atractoscion nobilis</i>    | 47 | NA    |           | KP722609 | EUS47246 | KP722885 | KP722973 | KP722791 | KP723065 | Rho         |
| <i>Atrobucca nibe</i>          | 48 | NA    |           | KP722610 | KP722702 | KP722886 | KP722974 | KP722792 | KP723066 | Rho         |
| <i>Austronibeae oedogenys</i>  | 49 | NA    |           | KP722611 |          | KP722887 | KP722975 | KP722793 | KP723067 | Rho         |
| <i>Bahaba taipingensis</i>     | 50 | NA    |           | KP722612 | KP722703 | KP722888 | KP722976 | KP722794 | KP723068 | Rho         |
| <i>Bairdiella cf armata</i>    | 51 | NA    |           | KP722613 | KP722704 | KP722889 | KP722977 | KP722795 | KP723069 | Rho SAC Con |
| <i>Bairdiella ronchus</i>      | 52 | NA    |           | KP722614 | KP722705 |          | KP722978 | KP722796 | KP723070 | Rho SAC     |
| <i>Boesemania microlepis</i>   | 53 | NA    |           | KP722615 | KP722706 | KP722890 | KP722979 | KP722797 | KP723071 | Rho         |
| <i>Cheilotrema saturnum</i>    | 54 | NA    |           | KP722616 | KP722707 | KP722891 | KP722980 | KP722798 | KP723072 | Rho SAC Con |
| <i>Chrysochir aureus</i>       | 55 | NA    |           | KP722617 | KP722708 | KP722892 | KP722981 | KP722799 | KP723073 | Rho         |
| <i>Cilus gilberti</i>          | 56 | NA    |           | KP722618 | KP722709 | KP722893 | KP722982 | KP722800 | KP723074 | Rho SAC Con |
| <i>Collichthys lucidus</i>     | 57 | NA    |           | KP722619 | KP722710 | KP722894 | KP722983 | KP722801 | KP723075 | Rho         |
| <i>Corvula macrops</i>         | 58 | NA    |           | KP722620 | KP722711 | KP722895 | KP722984 | KP722802 | KP723076 |             |
| <i>Corvula macrops</i>         | 59 | NA    |           |          | KP722712 | KP722896 | KP722985 | KP722803 | KP723077 | Rho SAC     |
| <i>Cynoscion acoupa</i>        | 60 | NA    |           | KP722621 | KP722713 | KP722897 | KP722986 | KP722804 | KP723078 | Rho         |
| <i>Cynoscion guatucupa</i>     | 61 | NA    |           | KP722622 | KP722714 | KP722898 | KP722987 | KP722805 | KP723079 | Rho         |
| <i>Cynoscion parvipinnis</i>   | 62 | NA    |           | KP722623 | KP722715 | KP722899 | KP722988 | KP722806 | KP723080 | Rho         |
| <i>Cynoscion praedatorius</i>  | 63 | NA    |           | KP722624 | KP722716 | KP722900 | KP722989 | KP722807 | KP723081 | Rho         |
| <i>Cynoscion regalis</i>       | 64 | NA    |           | KP722625 | KP722717 | KP722901 | KP722990 | KP722808 | KP723082 | Rho         |
| <i>Cynoscion reticulatus</i>   | 65 | NA    |           | KP722626 | KP722718 | KP722902 | KP722991 | KP722809 | KP723083 | Rho         |
| <i>Daysciaena albida</i>       | 66 | NA    |           | KP722627 | KP722719 | KP722903 | KP722992 | KP722810 | KP723084 | Rho         |
| <i>Dendrophysa russelii</i>    | 67 | NA    |           | KP722628 | KP722720 | KP722904 | KP722993 | KP722811 | KP723085 | Rho         |
| <i>Dicentrarchus labrax</i>    | 68 | NA    |           | AP009166 | AP009166 | KP722969 | KP723061 | KP722881 | KP723151 |             |
| <i>Equetus lanceolatus</i>     | 69 | NA    |           | KP722629 | KP722721 | KP722905 | KP722994 | KP722812 | KP723086 | Rho SAC Con |
| <i>Genyonemus lineatus</i>     | 70 | NA    |           | KP722630 | KP722722 | KP722906 | KP722995 | KP722813 |          | Rho SAC     |
| <i>Isopisthus remifer</i>      | 71 | NA    |           | KP722631 | KP722723 | KP722907 | KP722996 | KP722814 | KP723087 | Rho         |
| <i>Johnius amblycephalus</i>   | 72 | NA    |           | KP722632 | KP722724 | KP722908 | KP722997 | KP722815 | KP723088 | Rho         |
| <i>Johnius belangerii</i>      | 73 | NA    |           | KP722633 | KP722725 | KP722909 | KP722998 | KP722816 | KP723089 | Rho         |
| <i>Johnius borneensis</i>      | 74 | NA    |           | KP722634 |          | KP722910 | KP722999 | KP722817 | KP723090 | Rho         |
| <i>Johnius carouna</i>         | 75 | NA    |           | KP722635 | KP722726 | KP722911 | KP723000 | KP722818 | KP723091 | Rho         |
| <i>Johnius distinctus</i>      | 76 | NA    |           | KP722636 |          | KP722912 | KP723001 | KP722819 | KP723092 | Rho         |
| <i>Johnius heterolepis</i>     | 77 | NA    |           | KP722637 |          | KP722913 | KP723002 | KP722820 | KP723093 | Rho         |
| <i>Johnius macropterus</i>     | 78 | NA    |           | KP722638 | KP722727 | KP722914 | KP723003 | KP722821 | KP723094 | Rho         |
| <i>Johnius majan</i>           | 79 | NA    |           | KP722639 | KP722728 | KP722915 | KP723004 | KP722822 | KP723095 | Rho         |
| <i>Johnius trewavasae</i>      | 80 | NA    |           | KP722640 | KP722729 | KP722916 | KP723005 | KP722823 | KP723096 | Rho         |
| <i>Larimichthys crocea</i>     | 81 | NA    |           | KP722641 | KP722730 | KP722917 | KP723006 | KP722824 | KP723097 | Rho         |
| <i>Larimichthys polyactis</i>  | 82 | NA    |           | KP722642 | KP722731 | KP722918 | KP723007 | KP722825 | KP723098 | Rho         |
| <i>Larimus pacificus</i>       | 83 | NA    |           | KP722643 | KP722732 | KP722919 | KP723008 | KP722826 | KP723099 | Rho SAC Con |
| <i>Leiostomus xanthurus</i>    | 84 | NA    |           | KP722644 | KP722733 | KP722920 | KP723009 | KP722827 | KP723100 | Rho         |
| <i>Macrondon ancylodon</i>     | 85 | NA    |           | KP722645 | KP722734 | KP722921 | KP723010 | KP722828 | KP723101 | Rho         |
| <i>Megalonibeae fusca</i>      | 86 | NA    |           | KP722646 | KP722735 | KP722922 | KP723011 | KP722829 | KP723102 | Rho         |
| <i>Menticirrhus americanus</i> | 87 | NA    |           | KP722647 | KP722736 | KP722923 | KP723012 | KP722830 | KP723103 | Rho         |
| <i>Menticirrhus undulatus</i>  | 88 | NA    |           | KP722648 | KP722737 | KP722924 | KP723013 | KP722831 | KP723104 | Rho         |
| <i>Micropogonias ectenes</i>   | 89 | NA    |           | KP722649 | KP722738 | KP722925 | KP723014 | KP722832 | KP723105 | Rho         |
| <i>Micropogonias furnieri</i>  | 90 | NA    |           | KP722650 | KP722739 | KP722926 | KP723015 | KP722833 | KP723106 | Rho         |

|                                   |     |    |          |          |          |          |          |          |             |
|-----------------------------------|-----|----|----------|----------|----------|----------|----------|----------|-------------|
| <i>Micropogonias undulatus</i>    | 91  | NA | KP722651 | KP722740 | KP722927 | KP723016 | KP722834 | KP723107 | Rho         |
| <i>Michthys miiuy</i>             | 92  | NA | KP722652 | KP722741 | KP722928 | KP723017 | KP722835 | KP723108 | Rho         |
| <i>Monotaxis grandoculis</i>      | 93  | NA | EU036430 | FN689114 | EF095651 | Y18673   | KC442100 | KC442134 |             |
| <i>Nebris microps</i>             | 94  | NA | KP722653 | KP722742 | KP722929 | KP723018 | KP722836 | KP723109 | Rho SAC     |
| <i>Nibea albiflora</i>            | 95  | NA | KP722654 | KP722743 | KP722930 | KP723019 | KP722837 | KP723110 | Rho         |
| <i>Nibea microgenys</i>           | 96  | NA | KP722656 | KP722745 | KP722931 | KP723020 | KP722838 | KP723111 | Rho         |
| <i>Nibea soldado</i>              | 97  | NA | KP722657 | KP722746 | KP722932 | KP723021 | KP722839 | KP723112 | Rho         |
| <i>Nibea squamosa</i>             | 98  | NA | KP722658 | KP722747 | KP722933 | KP723022 | KP722840 | KP723113 | Rho         |
| <i>Odontoscion xanthops</i>       | 99  | NA | KP722659 | KP722748 |          | KP723023 | KP722841 |          | Rho SAC     |
| <i>Ophioscion punctatissimus</i>  | 100 | NA | KP722660 | KP722749 | KP722934 | KP723024 | KP722842 | KP723114 | Rho SAC Con |
| <i>Ophioscion scierus</i>         | 101 | NA | KP722661 | KP722750 |          | KP723025 | KP722843 | KP723115 |             |
| <i>Ophioscion vermicularis</i>    | 102 | NA | KP722662 | KP722751 | KP722935 | KP723026 | KP722844 | KP723116 | Rho SAC     |
| <i>Otolithes ruber</i>            | 103 | NA | KP722663 | KP722752 | KP722936 | KP723027 | KP722845 | KP723117 | Rho         |
| <i>Pachypops fourcroy</i>         | 104 | NA | KP722664 | KP722753 | KP722937 | KP723028 | KP722846 | KP723118 | Rho SAC Con |
| <i>Pachyurus bonariensis</i>      | 105 | NA | KP722665 | KP722754 | KP72293  | KP723029 | KP722847 | KP723119 | Rho SAC Con |
| <i>Panna microdon</i>             | 106 | NA | KP722666 | KP722755 | KP722939 | KP723030 | KP722848 | KP723120 | Rho         |
| <i>Paralonchurus brasiliensis</i> | 107 | NA | KP722667 | KP722756 | KP722940 | KP723031 | KP722849 | KP723121 | Rho SAC Con |
| <i>Pareques sp. 1</i>             | 108 | NA | KP722668 | KP722757 |          | KP723032 | KP722850 |          | Rho SAC     |
| <i>Pennahia argentata</i>         | 109 | NA | KP722669 | KP722758 | KP722941 | KP723033 | KP722851 | KP723122 | Rho         |
| <i>Pennahia macrocephalus</i>     | 110 | NA | KP722670 | KP722759 | KP722942 | KP723034 | KP722852 | KP723123 | Rho         |
| <i>Pennahia pawak</i>             | 111 | NA | KP722671 | KP722760 | KP722943 | KP723035 | KP722853 | KP723124 | Rho         |
| <i>Plagioscion auratus</i>        | 112 | NA | KP722672 | KP722761 | KP722944 | KP723036 | KP722854 | KP723125 | Rho SAC     |
| <i>Plagioscion squamosissimus</i> | 113 | NA | KP722673 | KP722762 | KP722945 | KP723037 | KP722855 | KP723126 |             |
| <i>Plagioscion surinamensis</i>   | 114 | NA | KP722674 | KP722763 | KP722946 | KP723038 | KP722856 | KP723127 | Rho SAC Con |
| <i>Plagioscion ternetzi</i>       | 115 | NA | KP722675 | KP722764 |          |          | KP722857 |          |             |
| <i>Pogonias cromis</i>            | 116 | NA | KP722676 | KP722765 | KP722947 | KP723039 | KP722858 | KP723128 |             |
| <i>Protonibea diacanthus</i>      | 117 | NA | KP722677 | KP722766 | KP722948 | KP723040 | KP722859 | KP723129 | Rho         |
| <i>Pseudolithus brachygnathus</i> | 118 | NA | KP722678 | KP722767 | KP722949 | KP723041 | KP722860 | KP723130 | Rho         |
| <i>Pseudolithus elongatus</i>     | 119 | NA | KP722679 | KP722768 | KP722950 | KP723042 | KP722861 | KP723131 | Rho         |
| <i>Pseudolithus senegallus</i>    | 120 | NA | KP722680 | KP722769 | KP722951 | KP723043 | KP722862 | KP723132 | Rho         |
| <i>Pseudolithus typus</i>         | 121 | NA | KP722681 | KP722770 |          | KP723044 | KP722863 | KP723133 | Rho         |
| <i>Pteroscion peli</i>            | 122 | NA | KP722682 | KP722771 | KP722952 | KP723045 | KP722864 | KP723134 | Rho         |
| <i>Pterolithus maculatus</i>      | 123 | NA | KP722683 | KP722772 | KP722953 | KP723046 | KP722865 | KP723135 | Rho         |
| <i>Roncador stearnsii</i>         | 124 | NA | KP722684 | KP722773 | KP722954 | KP723047 | KP722866 | KP723136 | Rho SAC Con |
| <i>Sciaena deliciosa</i>          | 125 | NA | KP722685 | KP722774 | KP722955 | KP723048 | KP722867 | KP723137 | Rho SAC Con |
| <i>Sciaena umbra</i>              | 126 | NA | KP722686 | KP722775 | KP722956 | KP723049 | KP722868 | KP723138 | Rho         |
| <i>Sciaenops ocellatus</i>        | 127 | NA | KP722687 | KP722776 | KP722957 | KP723050 | KP722869 | KP723139 | Rho         |
| <i>Seriphus politus</i>           | 128 | NA | KP722688 | KP722777 | KP722958 | KP723051 | KP722870 | KP723140 | Rho SAC Con |
| <i>Sparus aurata</i>              | 129 | NA | AF240735 | FN689315 | EF095657 | Y18665   | KC442100 | KC442134 |             |
| <i>Stellifer ericymba</i>         | 130 | NA | KP722689 | KP722778 | KP722959 | KP723052 | KP722871 | KP723141 | Rho SAC Con |
| <i>Stellifer microps</i>          | 131 | NA | KP722690 | KP722779 | KP722960 | KP723053 | KP722872 | KP723142 | Rho SAC Con |
| <i>Stellifer oscitans</i>         | 132 | NA | KP722691 | KP722780 | KP722961 | KP723054 | KP722873 | KP723143 | Rho SAC Con |
| <i>Stellifer rastrifer</i>        | 133 | NA | KP722692 | KP722781 | KP722962 | KP723055 | KP722874 | KP723144 | Rho SAC Con |
| <i>Totoaba macdonaldi</i>         | 134 | NA | KP722693 | KP722782 | KP722963 | KP723056 | KP722875 | KP723145 | Rho         |
| <i>Umbrina bussingi</i>           | 135 | NA | KP722694 | KP722783 | KP722964 | KP723057 | KP722876 | KP723146 | Rho SAC     |
| <i>Umbrina canariensis</i>        | 136 | NA | KP722695 | KP722784 | KP722965 |          | KP722877 | KP723147 |             |
| <i>Umbrina cirrosa</i>            | 137 | NA | KP722696 | KP722785 | KP722966 | KP723058 | KP722878 | KP723148 | Rho         |
| <i>Umbrina roncador</i>           | 138 | NA | KP722697 | KP722786 | KP722967 | KP723059 | KP722879 | KP723149 | Rho SAC     |
| <i>Umbrina xanti</i>              | 139 | NA | KP722698 | KP722787 | KP722968 | KP723060 | KP722880 | KP723150 | Rho SAC Con |

NOTE. Rho, Rhodopsin sequence included in dataset for analyses of molecular evolution; Con, Sequences used in control gene dataset; SAC, Rhodopsin sequences used in analyses of just the South American clade and marine sister species.

**Table S16. Results for Partition Finder analyses of concatenated dataset.**

| Gene        | Length | Mr. Bayes |         | RaxML     |         |
|-------------|--------|-----------|---------|-----------|---------|
|             |        | Partition | Model   | Partition | Model   |
| Rh1         | 827    | 1         | K80+I+G | 1         | GTR+I+G |
| Cytb        | 1104   | 2         | GTR+I+G | 2         | GTR+I+G |
| COI         | 648    | 3         | GTR+I+G | 3         | GTR+I+G |
| EGR1        | 896    | 4         | HKY+I+G | 4         | GTR+I+G |
| EGR2        | 1124   | 4         | HKY+I+G | 4         | GTR+I+G |
| EGR2 intron | 422    | 5         | K80+I+G | 5         | GTR+G   |
| Rag1        | 1439   | 6         | SYM+I+G | 6         | GTR+I+G |





**Fig. S1.** Bayesian species tree reconstructed using a concatenated alignment of four nuclear loci and two mitochondrial loci. Posterior probability values displayed at nodes. Marine lineages in blue, freshwater lineages in yellow, transitional branches shown as purple arrows, and outgroup taxa shown in grey. Green and pink branches show the two possible sister groups to the South American freshwater clade. Branches proportional to number of substitutions per site.

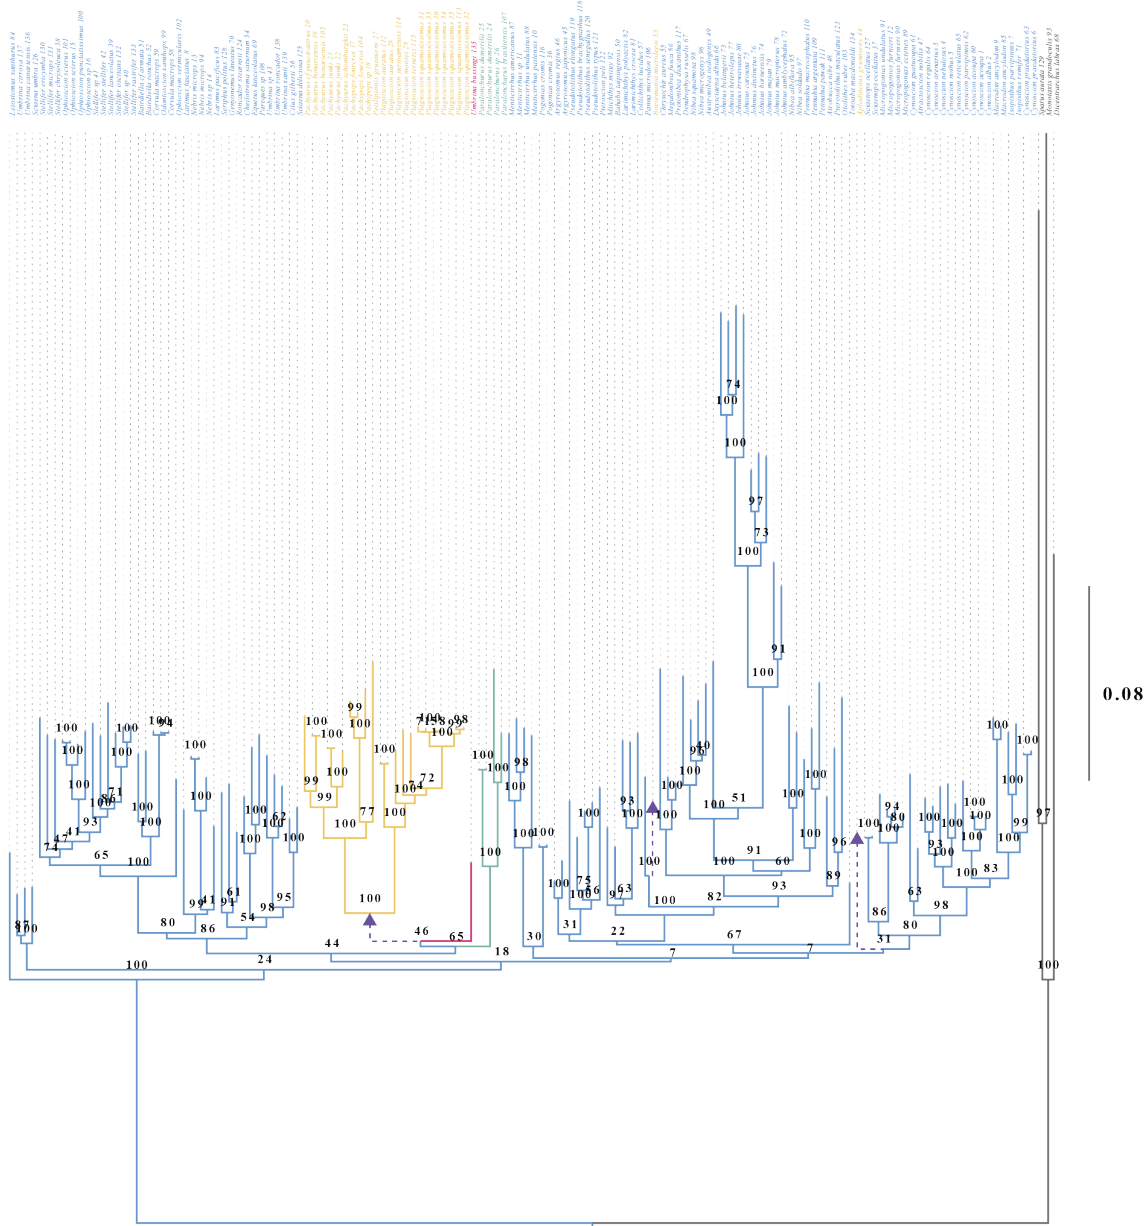

**Fig. S2.** Maximum likelihood species tree reconstructed using a concatenated alignment of four nuclear loci and two mitochondrial loci. Bootstrap support values from 1000 replicate analyses displayed at nodes. Marine lineages in blue, freshwater lineages in yellow, transitional branches

shown as purple arrows, and outgroup taxa shown in grey. Green and pink branches show the two possible sister groups to the South American freshwater clade. Branches proportional to number of substitutions per site.

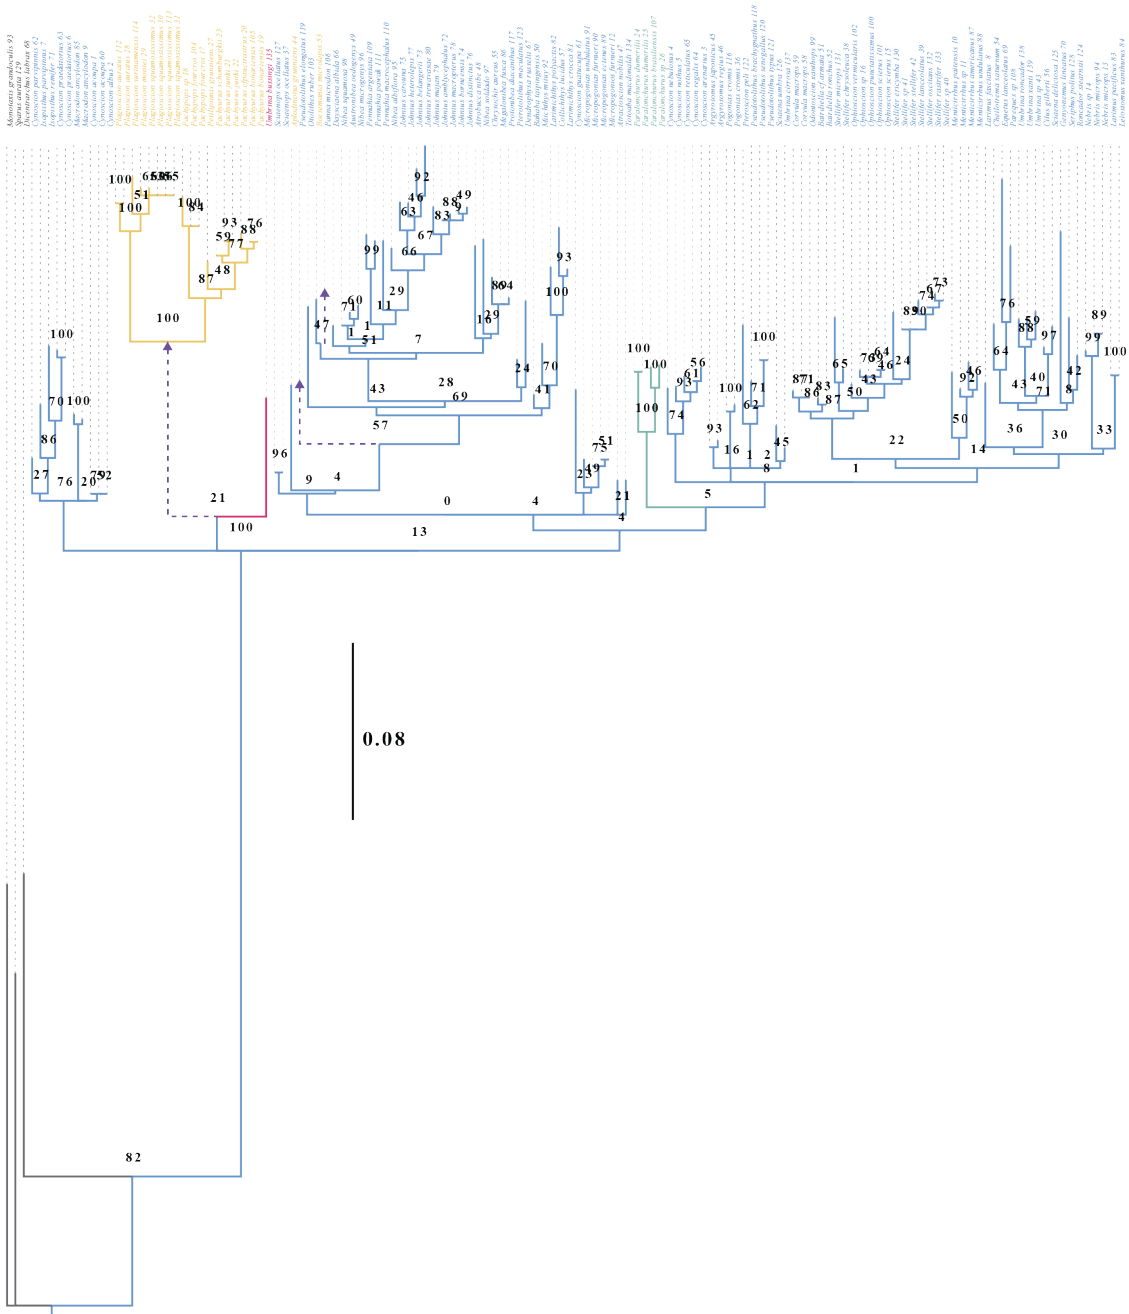

**Fig. S3.** Maximum likelihood rhodopsin gene tree. Bootstrap support values from 1000 replicate analyses displayed at nodes. Marine lineages in blue, freshwater lineages in yellow, transitional

branches shown as purple arrows, and outgroup taxa shown in grey. Green and pink branches show the two possible sister groups to the South American freshwater clade. Branches proportional to number of substitutions per site.

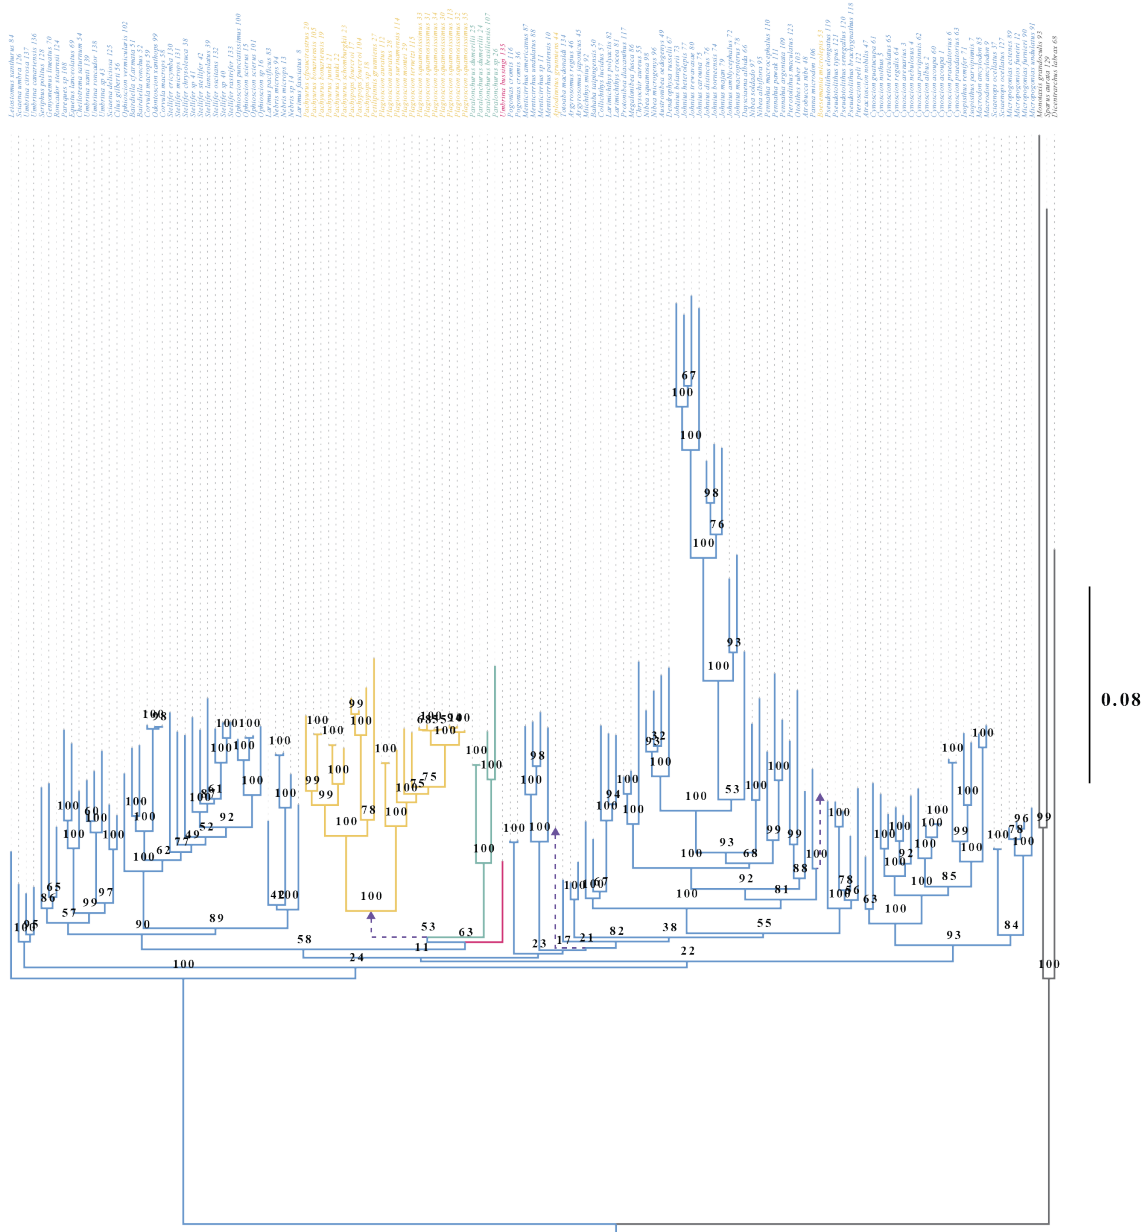

**Fig. S4.** Maximum likelihood species tree reconstructed using a concatenated alignment of four nuclear loci and two mitochondrial loci but with site 165 and 214 removed from rhodopsin dataset. Bootstrap support values from 1000 replicate analyses displayed at nodes. Marine lineages in blue, freshwater lineages in yellow, transitional branches shown as purple arrows, and

outgroup taxa shown in grey. Green and pink branches show the two possible sister groups to the South American freshwater clade. Branches proportional to number of substitutions per site.

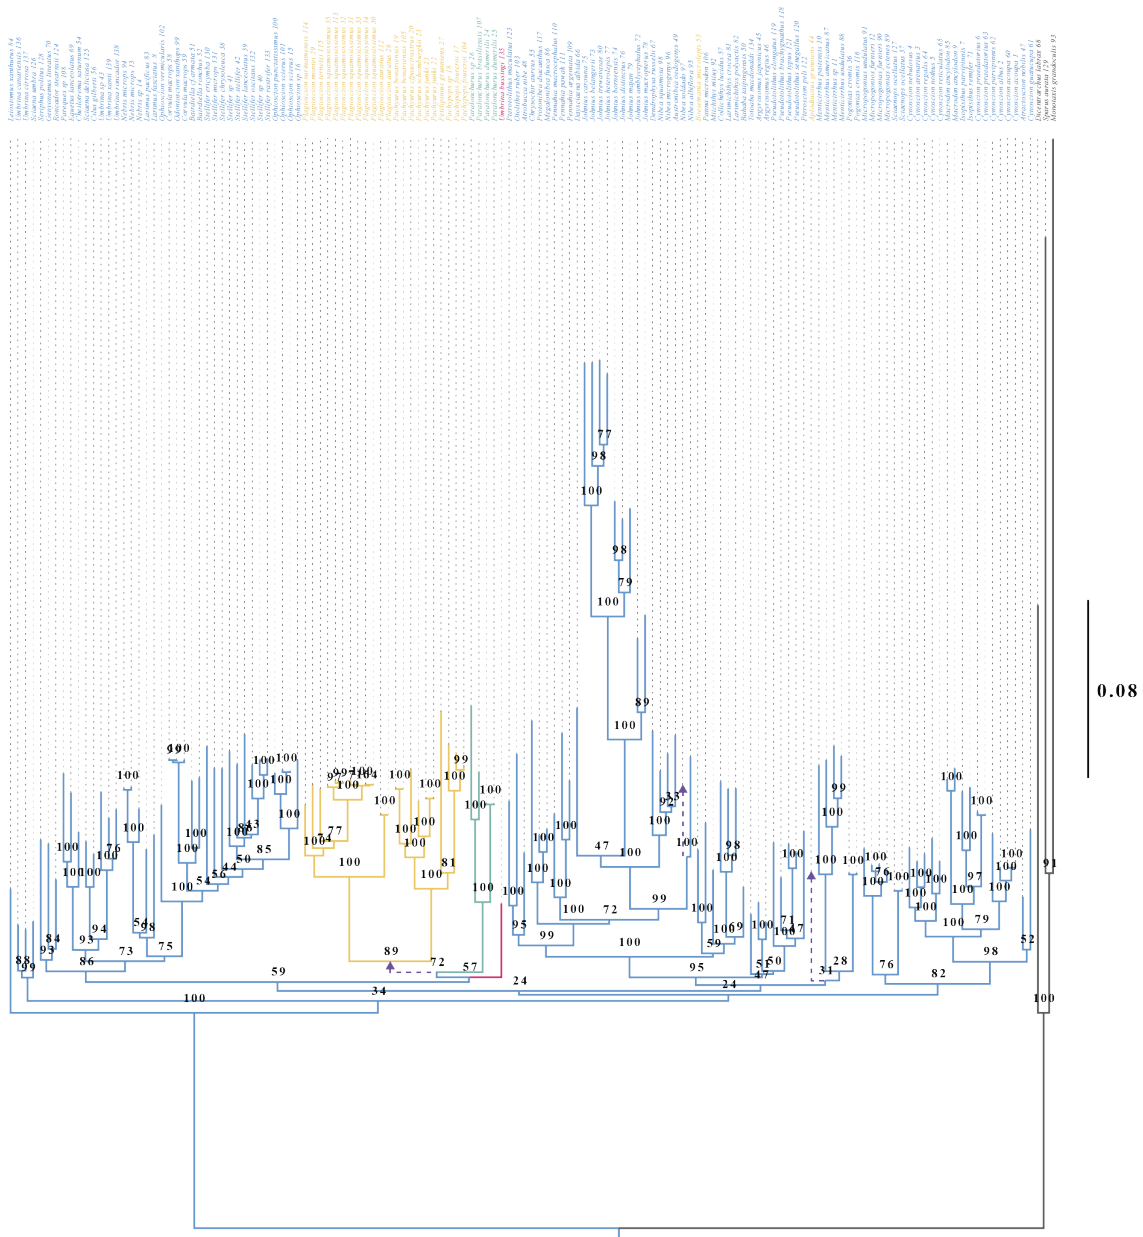

**Fig. S5.** Maximum likelihood species tree reconstructed using a concatenated alignment of four nuclear loci and two mitochondrial loci but with the first and second codon position removed from rhodopsin. Bootstrap support values from 1000 replicate analyses displayed at nodes. Marine lineages in blue, freshwater lineages in yellow, transitional branches shown as purple arrows, and outgroup taxa shown in grey. Green and pink branches show the two possible sister

groups to the South American freshwater clade. Branches proportional to number of substitutions per site.

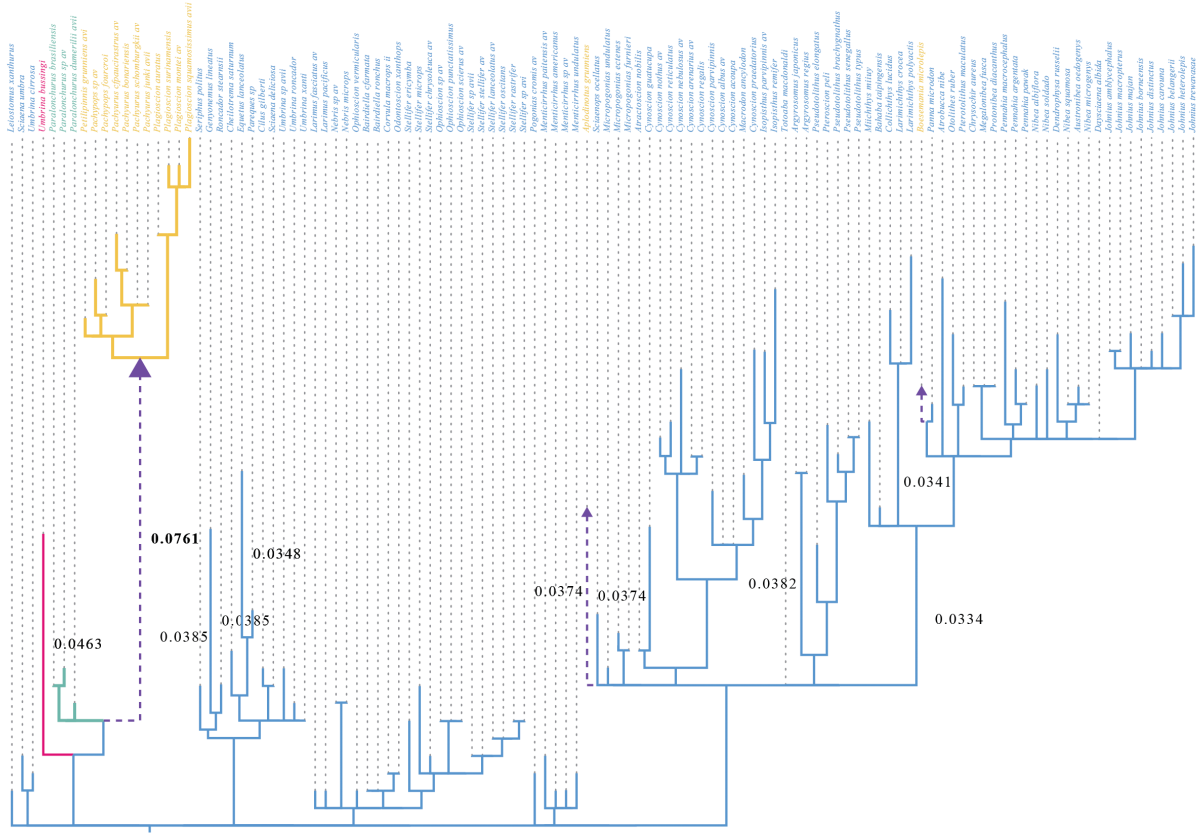

**Fig. S6.** Bayesian phylogeny with branch lengths scaled by number of amino acid substitutions. Branch lengths estimated in PAML using the WAG substitution matrix. Branch lengths above 0.03 shown on tree. Marine lineages in blue, freshwater lineages in yellow, transitional branches shown as purple arrows. Green and pink branches show the two possible sister groups to the South American freshwater clade.

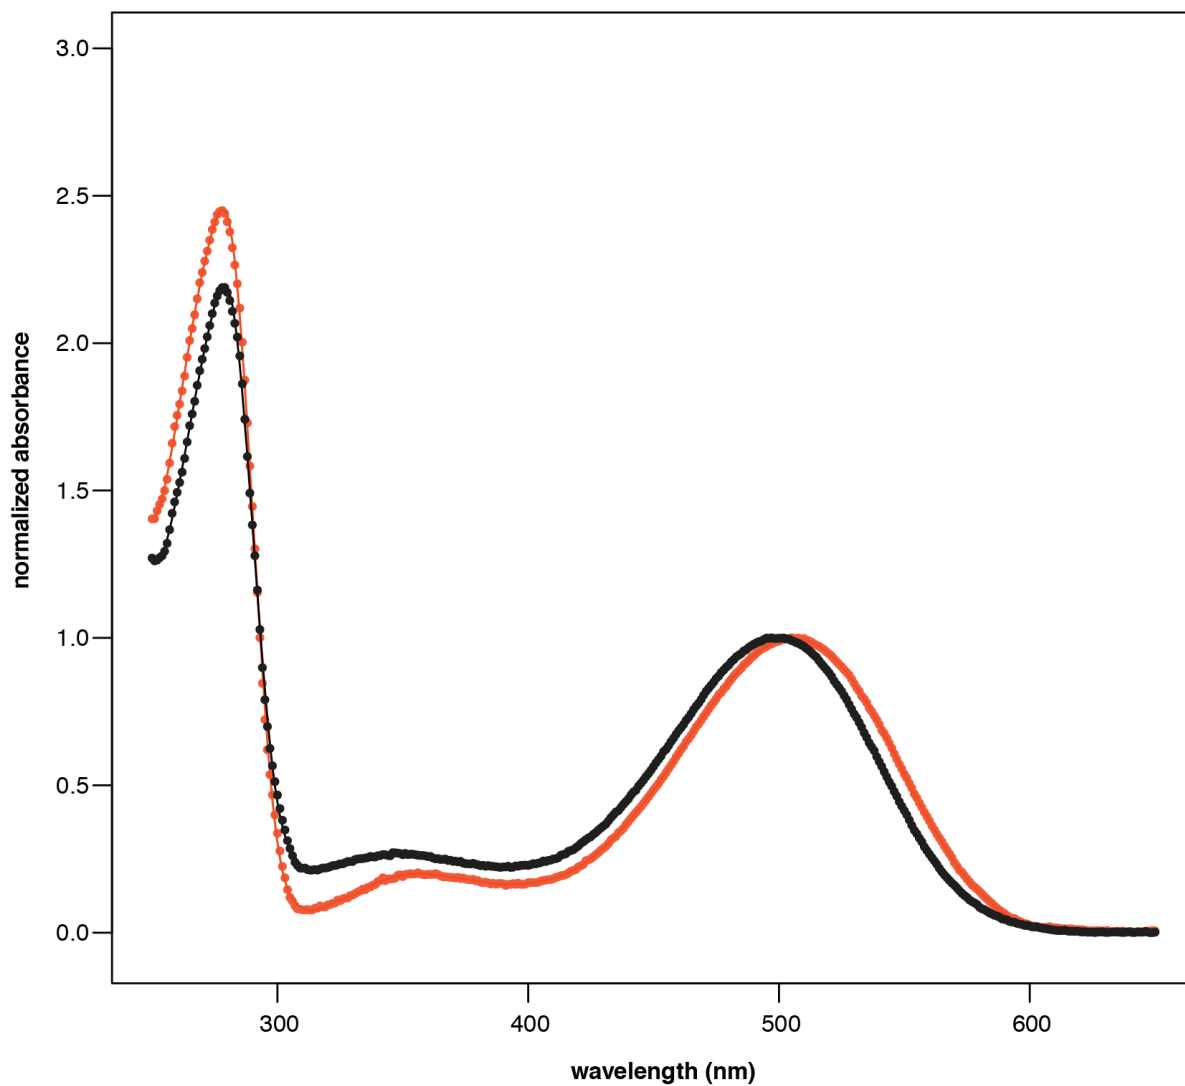

**Fig. S7.** Spectral absorbance curve of dark-state wild-type bovine rhodopsin (black) and bovine rhodopsin made to have freshwater like croaker rhodopsin residues at site 119, 122, and 165 (red) using site-directed mutagenesis.

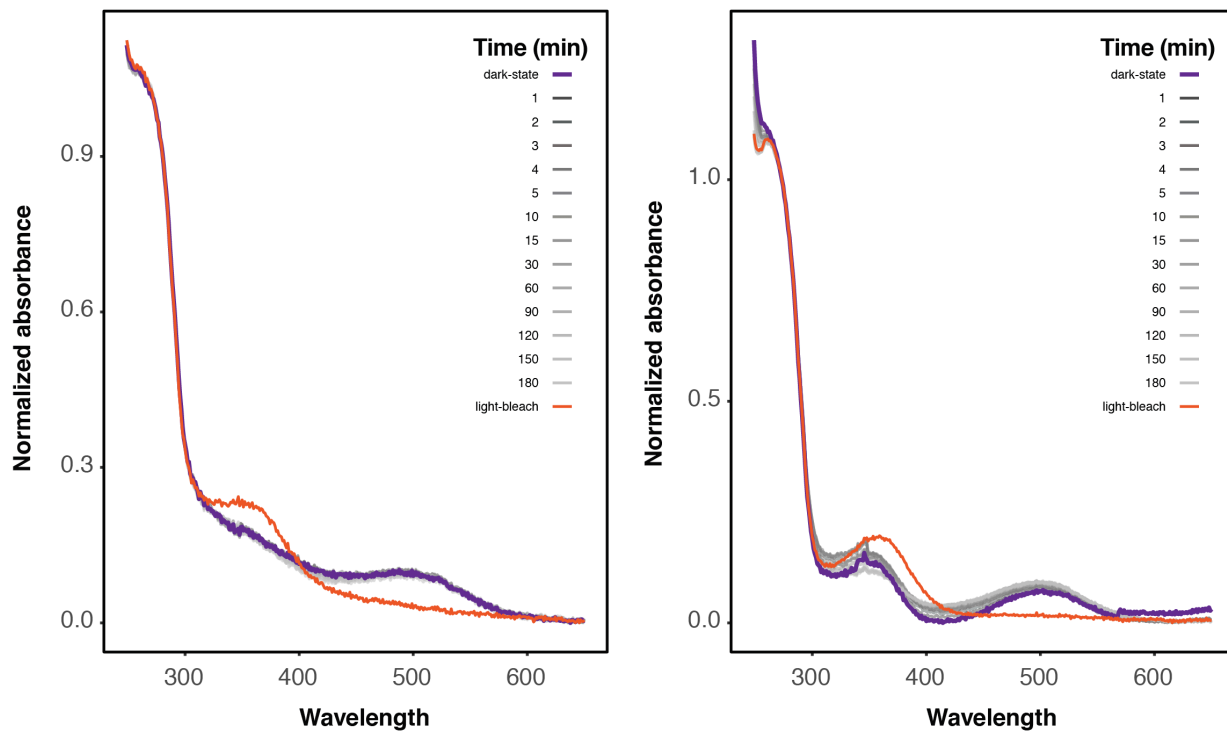

**Fig. S8. Hydroxylamine assay of ancestral marine and freshwater rhodopsin pigments.** Spectral absorbance curve of freshwater (left) and marine (right) ancestral croaker rhodopsin pigments. Measurements taken before the addition of 50mM hydroxylamine (purple line) and every minute subsequently for 5 minutes, every 5 minutes from 5 to fifteen minutes and every 30 minutes thereafter (shades of grey). Lastly, rhodopsin was bleached for thirty seconds and measured again (orange line).

## Supplementary Text

### *Sequencing Methods*

DNA was extracted from 43 tissue samples preserved in ethanol, representing 36 species using a QIAGEN DNeasy kit (Qiagen Inc, Santa Clara CA, USA). PCR primers and protocols have been previously published in (Lo et al. 2015; Van Nynatten et al. 2015) (**supplementary table S14**). For cytochrome b (ctyb), each PCR reaction contained 2  $\mu$ L of template DNA, 2.5  $\mu$ L of 10X PCR buffer, 1.5  $\mu$ L of 25 mM MgCl<sub>2</sub>, 2.0  $\mu$ L of 10 mM dNTPs, 1.0  $\mu$ L of forward and reverse primers, 0.5  $\mu$ L of 5 U/ $\mu$ L Taq DNA polymerase, and ddH<sub>2</sub>O for a final volume of 25  $\mu$ L. For cytochrome c oxidase subunit I (coi), each PCR reaction contained 2  $\mu$ L of template DNA, 2.5  $\mu$ L of 10X PCR buffer, 1.5  $\mu$ L of 25 mM MgCl<sub>2</sub>, 0.5  $\mu$ L of 10 mM dNTPs, 0.5  $\mu$ L of forward and reverse primers, 0.2  $\mu$ L of 5 U/ $\mu$ L Taq DNA polymerase, and ddH<sub>2</sub>O for a final volume of 25  $\mu$ L. For the nuclear genes, rhodopsin (rho), recombination activating factor 1 (rag1), and early growth response protein 1 and 2 (egr-1 and egr-2), each PCR reaction contained 3  $\mu$ L of template DNA, 3.0  $\mu$ L of 10X PCR buffer, 2.0  $\mu$ L of 25 mM MgCl<sub>2</sub>, 2.4  $\mu$ L of X10 mM dNTPs, 1.5  $\mu$ L of forward and reverse primers, 0.3  $\mu$ L of 5 U/ $\mu$ L Taq DNA polymerase, and ddH<sub>2</sub>O for a final volume of 25  $\mu$ L. Rho, rag1, and egr-1 were amplified using an initial denaturation phase at 95°C for 4 minutes, followed by 35 cycles of 95°C (40s), 55°C (40s), and 72°C (90s), followed by a 7-minute extension phase at 72°C. Egr-2 was amplified using an initial denaturation phase at 95°C for 4 minutes, followed by 35 cycles of 95°C (40s), 52°C (40s), and 72°C (90s), followed by a 7-minute extension phase at 72°C. Cytb was amplified using an initial denaturation phase at 95°C for 2 minutes, followed by 35 cycles of 95°C (30s), 49°C (60s), and 72°C (90s), followed by a 5-minute extension phase at 72°C. Coi was amplified using an initial denaturation phase at 95°C for 2 minutes, followed by 35 cycles of 94°C (30s), 52°C (40s), and 72°C (90s), followed by a 5-minute extension phase at 72°C. PCR products were visualized on a 1.5% agarose gel and were compared to an 100 bp ladder to check that amplicons were the correct size. PCR products were purified using ExoSAP-I PCR Product Cleanup Reagent (Applied Biosystems, Foster City, CA, USA) and sequenced by Sanger sequencing at the Hospital for Sick Children TCAG Sequencing Facility. Chromatograms were compared for forward and reverse reads in Geneious (Kearse et al. 2012). These sequences (from 43 individuals) were combined with additional sequences for the same six molecular markers generated in a previous phylogenetic reconstruction of croakers (Lo et al. 2015) to form a dataset



of 139 taxa (Genbank accession number in **supplementary table S15**, Supplementary Material online). Sequences for each gene in the final dataset were aligned using MUSCLE independently (Edgar 2004). Terminal gaps were removed when present in more than half of the samples. We concatenated the alignments of all six molecular markers for a total dataset length of 6460bp.

### *Phylogenetic Reconstructions*

Model searches in Partition Finder (Lanfear et al. 2016) were constrained to models available in RAXML and Mr. Bayes, and the best fitting partitioning scheme was chosen using a Bayes Information Criterion (BIC) approach (**supplementary table S16**). Tracer was used to visualize log-likelihood values for each parameter estimate across successive samples in the Bayesian phylogenetic reconstruction to determine if stationarity was reached and to ensure that each parameter estimate had an effective sample size of greater than 200.

### *Molecular Evolutionary Analyses*

We pruned our dataset to include only species with rhodopsin sequence data and removed all terminal gaps, outgroups and duplicate taxa. This resulted in an 825 bp long dataset, spanning all seven transmembrane helices of rhodopsin with sequences from 114 taxa. Branch-sites models in PAML include a parameter allowing positive selection in a subset of sites on the foreground, but constrains all other branches to be less than or equal to one. Explicit support for positive selection on the foreground lineage can be established with likelihood ratio tests (LRTs) with a nested null branch-site model where  $d_N/d_S$  estimates for the positively selected site class are constrained to equal one on foreground lineages (Yang and Nielsen 2002).

We also employed clade model C and D (CmC, CmD) in PAML (Bielawski and Yang 2004). These models allow multiple independent foreground lineages and do not constrain background lineages to be less than or equal to one, allowing positive selection in the background. Support for the divergent site class parameter included in CmC can be established with LRTs to the nested null model M2aREL, which assumes uniform  $d_N/d_S$  estimates for each site class parameter across the entire tree. Support for positive selection in the foreground divergent site class estimate can also be tested explicitly using a modified CmC null model where the foreground is constrained to equal one. CmD differs from CmC in that the second site class, with a uniform

dN/dS estimate across the phylogeny, is freely estimated and more flexible than the comparable site class in CmC that is constrained to equal one. This allows for more than one class of positively selected sites in CmD. The nested null model for CmD is M3, which has three freely estimated site classes but assumes uniform selection across the tree.

CmC and CmD can be used to determine the number of foreground partitions that best fit the data by comparing nested partitioning schemes (Schott et al. 2014). We partitioned our Croaker phylogeny so that freshwater invading lineages were the foreground. We tested this scheme using branch-sites and clade model analyses. We also isolated each individual freshwater invasion event as individual foreground lineages using both aforementioned models in PAML. We compared the clade model results for each freshwater invasion event with a more parameter rich partitioning scheme with each freshwater invasion event as its own isolated foreground partition with independent dN/dS estimate.

#### *Protein expression and functional characterization*

Ancestral sequences at the nodes bracketing the marine to freshwater transition in South America were synthesized using GeneArt (Invitrogen). To improve expression levels in HEK cells we appended the N and C terminal segments of the gene with human sequence and converted codon identities to match those of human rhodopsin where possible. The first two and last codon in the sequence were converted to match 5' and 3' restriction sites for insertion into the P1D3-hrGFP II expression vector (Morrow and Chang 2010). Because expression levels of these ancestral pigments were not sufficient for kinetic assays we used site-directed mutagenesis primers to induce single amino acid substitutions to convert the amino acid identities in bovine rhodopsin at sites 119, 122, 124 and 261 to match the marine and freshwater croaker sequences *via* PCR (QuickChange II, Agilent). All sequences were verified using a 3730 DNA Analyzer (Applied Biosystems) at the Centre for Analysis of Genome Evolution and Function (CAGEF) at the University of Toronto. All croaker and bovine rhodopsin sequences were transferred to the pIRES-hrGFP II expression vector (Stratagene) for subsequent transient transfection of HEK293T cells (8 µg per 10 cm plate) using Lipofectamine 2000 (Invitrogen). 30 plates were used to express each ancestral rhodopsin pigments. 14 plates were used to express the bovine rhodopsin pigments (wild-type and site-directed freshwater mutants). Media was changed after

24 hours, and cells were harvested 48 hours post-transfection. Cells were washed twice with harvesting buffer (PBS, 10 µg/mL aprotinin, 10 µg/mL leupeptin), and rhodopsins were regenerated for 2 hours in the dark with 5 µM 11-*cis*-retinal generously provided by Dr. Rosalie Crouch (Medical University of South Carolina). After regeneration the samples were incubated at 4°C in solubilization buffer (50 mM Tris pH 6.8, 100 mM NaCl, 1 mM CaCl<sub>2</sub>, 1% dodecylmaltoside, 0.1 mM PMSF) for 2 hours and immunoaffinity purified overnight using the 1D4 monoclonal antibody coupled to the UltraLink Hydrazide Resin (ThermoFisher Scientific). Resin was washed three times with wash buffer 1 (50 mM Tris pH 7.0, 100 mM NaCl, 0.1% dodecylmaltoside) and twice using wash buffer 2 (50 mM sodium phosphate, 0.1% dodecylmaltoside; pH 7.0). Rhodopsins were eluted from the UltraLink resin using 5 mg/mL of a 1D4 peptide, consisting of the last 9 amino acids of bovine rhodopsin (TETSQVAPA).

The UV-visible absorption spectra of purified rhodopsin samples were recorded in the dark at 20 °C using a Cary 4000 double-beam absorbance spectrophotometer (Agilent). All peak spectral sensitivities were determined by fitting dark spectra to a standard template curve for A1 visual pigments (Govardovskii et al. 2000). Rhodopsin samples were light-activated for 30 seconds using a fiber optic lamp (Dolan-Jenner), resulting in a shift in peak spectral sensitivity to ~ 380 nm, characteristic of the biologically active metarhodopsin II intermediate (Van Eps et al. 2017). Pigments were also exposed to hydroxylamine (NH<sub>2</sub>OH; 50mM) to test accessibility of the rhodopsin binding pocket before and after light activation, as previously described (Sakmar et al. 1989). Retinal release following rhodopsin photoactivation was monitored using a Cary Eclipse fluorescence spectrophotometer equipped with a Xenon flash lamp (Agilent), according to a protocol modified from previous studies (Farrens and Khorana 1995; Schafer et al. 2016). Rhodopsin samples (0.1-0.2 µM) were bleached for 30 seconds at 20°C with a fiber optic lamp (Dolan-Jenner) using a filter to restrict wavelengths of light below 475 nm to minimize heat. Fluorescence measurements were recorded at 30-second intervals with a 2 second integration time, using an excitation wavelength of 295 nm (1.5 nm slit width) and an emission wavelength of 330 nm (10 nm slit width). There was no noticeable activation by the excitation beam prior to rhodopsin activation. This assay detected increasing fluorescence as a result of decreased quenching of intrinsic tryptophan fluorescence at W265 by the retinal chromophore (Farrens and Khorana 1995), and is a reliable proxy for the tracking the decay of MII (Schafer et al. 2016). Data was fit to a three variable, first order exponential equation ( $y = y_0 + a(1 - e^{-bx})$ ), and half-life values were

calculated using the rate constant  $b$  ( $t_{1/2} = \ln 2/b$ ). All curve fitting resulted in  $r^2$  values greater than 0.95.

#### *Comparing CmC with CmD when two classes of positively selected sites present*

CmD can also be directly compared with CmC, which differ only in how they estimate the second site class, to establish support for a second site class parameter different than one. M3 can also be set to have more than three site classes, and can be used to determine the number of site classes required to fit the data effectively by comparing models with more site classes with models with fewer (Bielawski and Yang 2004). We used this approach to test if the positively selected sites in the marine dataset (pervasive positively selected sites) were interfering with our estimation of episodic selection using CmC, which was not significantly better fitting than M2aREL (its requisite null model) and significantly worse fitting than CmD (**supplementary table S11**). Setting the number of site classes in M3 to four was significantly better fitting than three site classes (**supplementary table S11**). The fourth site class was occupied by two sites, 165 and 214, and had a very high  $d_N/d_S$  estimate (13.64, **supplementary table S11**). We suspected that these highly positively selected sites were shifting the estimate for the third site class in CmC, the only site class in this model allowed to be above one, beyond what was appropriate for modelling the divergent selection detected on the transitional branch using Branch-sites, CmD, Branch-sites REL and even the Two-Ratio model. Removing these two sites and re-running the analyses returned parameter estimates consistent with those reported for the other branch and clade models (**supplementary table S11**) This suggests that in models with more than one class of positively selected sites, CmD should be used, as it has the flexibility to model more than one class of positively selected sites.

#### *Positively selected sites and phylogenetic incongruence*

In the Bayesian phylogeny, the sister group to the freshwater clade is the Paralonchurus clade, previously identified as the sister group to the freshwater Claude in (Lo et al. 2015). However, this previous study contained only one Paralonchurus species. In the maximum likelihood species tree and maximum likelihood rhodopsin gene tree *Umbrina bussingi* was reconstructed as the sister species, which disagrees with this previous and Bayesian topology.

When the two highly positively selected sites 165 and 214 were removed from the rhodopsin partition of our concatenated alignment this topological incongruence in Bayesian and Maximum likelihood species trees disappeared and the maximum likelihood species tree was reconstructed with *Paralonchurus* as the sister group (**supplementary figure S4**). The same is true when the first and second codon position are removed from the rhodopsin partition (**supplementary figure S5**).

### Supplementary Reference

- Baldwin CC, Mounts JH, Smith DG, Weigt LA. 2009. Genetic identification and color descriptions of early life-history stages of Belizean *Phaeoptyx* and *Astrapogon* (Teleostei: Apogonidae) with comments on identification of adult *Phaeoptyx*. *Zootaxa* 2008: 1–22.
- Beatty DD. 1973. Visual pigments of several species of teleost fishes. *Vision Res.* 13:989–992
- Bielawski JP, Yang Z. 2004. A Maximum Likelihood Method for Detecting Functional Divergence at Individual Codon Sites, with Application to Gene Family Evolution. *J. Mol. Evol.* 59:121–132.
- Castiglione GM, Chang BSW. 2018. Functional trade-offs and environmental variation shaped ancient trajectories in the evolution of dim-light vision. *eLife* 7, 348
- Chen WJ, Bonillo C, Lecointre G. 2003. Repeatability of clades as a criterion of reliability: a case study for molecular phylogeny of Acanthomorpha (Teleostei) with larger number of taxa. *Mol. Phylogenetics Evol.* 26:262–288.
- Edgar RC. 2004. MUSCLE: multiple sequence alignment with high accuracy and high throughput. *Nucleic Acids Res.* 32:1792–1797.
- Farrens DL, Khorana HG. 1995. Structure and Function in Rhodopsin. *J Biol Chem* 270:5073–5076.
- Govardovskii VI, Fyhrquist N, Reuter T, Kuzmin DG, Donner K. 2000. In search of the visual pigment template. *Vis. Neurosci.* 17:509–528.
- Kearse M, Moir R, Wilson A, Stones-Havas S, Cheung M, Sturrock S, Buxton S, Cooper A, Markowitz S, Duran C, et al. 2012. Geneious Basic: An integrated and extendable desktop software platform for the organization and analysis of sequence data. *Bioinformatics* 28:1647–1649.
- Lanfear R, Frandsen PB, Wright AM, Senfeld T, Calcott B. 2016. PartitionFinder 2: New Methods for Selecting Partitioned Models of Evolution for Molecular and Morphological Phylogenetic Analyses. *Mol. Biol. Evol.* 34:msw260–msw773.
- Lo P-C, Liu S-H, Chao NL, Nunoo FKE, Mok H-K, Chen WJ. 2015. A multi-gene dataset reveals a tropical New World origin and Early Miocene diversification of croakers (Perciformes: Sciaenidae). *Mol. Phylogenetics Evol.* 88:132–143.
- López JA, Chen WJ, Orti G. 2004. Esociform Phylogeny. Wood RM, editor. *Copeia* 2004:449–464.
- Morrow JM, Chang BSW. 2010. The p1D4-hrGFP II expression vector: A tool for expressing and purifying visual pigments and other G protein-coupled receptors. *Plasmid* 64:162–169.

- Sakmar TP, Franke RR, Khorana HG. 1989. Glutamic acid-113 serves as the retinylidene Schiff base counterion in bovine rhodopsin. *Proc. Natl. Acad. Sci. U.S.A.* 86:8309–8313.
- Schafer CT, Fay JF, Janz JM, Farrens DL. 2016. Decay of an active GPCR: Conformational dynamics govern agonist rebinding and persistence of an active, yet empty, receptor state. *Proc. Natl. Acad. Sci. U.S.A.* 113:11961–11966.
- Schott RK, Refvik SP, Hauser FE, López-Fernández H, Chang BSW. 2014. Divergent Positive Selection in Rhodopsin from Lake and Riverine Cichlid Fishes. *Mol. Biol. Evol.* 31:1149–1165.
- Van Eps N, Caro LN, Morizumi T, Kusnetzow AK, Szczepek M, Hofmann KP, Bayburt TH, Sligar SG, Ernst OP, Hubbell WL. 2017. Conformational equilibria of light-activated rhodopsin in nanodiscs. *Proc. Natl. Acad. Sci. U.S.A.* 114:E3268–E3275.
- Van Nynatten A, Bloom DD, Chang BSW, Lovejoy NR. 2015. Out of the blue: adaptive visual pigment evolution accompanies Amazon invasion. *Biol. Lett.* 11:20150349.
- Ward RD, Zemlak TS, Innes BH, Last PR, Hebert PDN. 2005. DNA barcoding Australia's fish species. *Phil. Trans. R. Soc. Lond. B* 360:1847–1857.
- Yang Z, Nielsen R. 2002. Codon-Substitution Models for Detecting Molecular Adaptation at Individual Sites Along Specific Lineages. *Mol. Biol. Evol.* 19:908–917.
